1 ***Entamoeba histolytica* EHD1 is involved in mitosome-endosome contact**

2 Herbert J. Santos<sup>a,b</sup>, Yuki Hanadate<sup>b</sup>, Kenichiro Imai<sup>c</sup>, Haruo Watanabe<sup>d</sup>, and Tomoyoshi  
3 Nozaki<sup>a,b\*</sup>

4 <sup>a</sup>Department of Biomedical Chemistry, Graduate School of Medicine, The University of  
5 Tokyo, 7-3-1 Hongo, Bunkyo-ku, Tokyo 113-0033, Japan;

6 <sup>b</sup>Department of Parasitology, National Institute of Infectious Diseases, 1-23-1 Toyama,  
7 Shinjuku-ku, Tokyo 162-8640, Japan;

8 <sup>c</sup>Cellular and Molecular Biotechnology Research Institute, National Institute of Advanced  
9 Industrial Science and Technology (AIST), 2-4-7 Aomi, Koto-ku, Tokyo 135-0064, Japan;

10 <sup>d</sup>Department of Bacteriology, National Institute of Infectious Diseases, 1-23-1 Toyama,  
11 Shinjuku, Tokyo 162-8640, Japan

12

13 \* Correspondence: nozaki@m.u-tokyo.ac.jp

14

15 **Abstract**

16 Inter-organellar crosstalk is often mediated by membrane contact sites (MCSs),  
17 which are zones where participating membranes come within a proximity of 30 nm. MCSs  
18 have been found in organelles including the endoplasmic reticulum, Golgi bodies,  
19 endosomes, and mitochondria. Despite its seeming ubiquity, reports of MCS involving  
20 mitochondrion-related organelles (MROs) present in a few anaerobic parasitic protozoa  
21 remain lacking. *Entamoeba histolytica*, the etiological agent of amoebiasis, possesses an  
22 MRO called mitosome. We previously discovered several *Entamoeba*-specific  
23 transmembrane mitochondrial proteins (ETMPs) from in silico and cell biological analyses.

24 One of them, ETMP1 (EHI\_175060), was predicted to have one transmembrane domain  
25 and two coiled-coil regions, and was demonstrated to be mitosome membrane-integrated  
26 based on carbonate fractionation and immunoelectron microscopy (IEM)  
27 data. Immunoprecipitation analysis detected a candidate interacting partner, EH-domain  
28 containing protein (EHD1, EHI\_105270). We expressed HA-tagged EHD1 in *E. histolytica*  
29 and subsequent immunofluorescence and IEM data indicated an unprecedented MCS  
30 between the mitosome and the endosome. Live imaging of GFP-EHD1 expressing strain  
31 demonstrated that EHD1 is involved in early endosome formation, and is observed in  
32 MCS between endosomes of various sizes. In vitro assay using recombinant His-EHD1  
33 demonstrated ATPase activity. MCSs are involved in lipid transfer, ion homeostasis,  
34 and organelle dynamics. The serendipitous discovery of the ETMP1 interacting partner  
35 EHD1, led to the observation of the mitosome-endosome contact site in *E. histolytica*. It  
36 opened a new view of how the relic mitochondria of *Entamoeba* may likewise be involved  
37 in organelle crosstalk, a conserved feature of mitochondria and other organelles in  
38 general.

39 *Abstract word count: 248 words*

40

## 41 **Introduction**

42 Membrane contact sites (MCSs) mediate communication and exchanges between  
43 membrane-bound compartments by the assembly of protein-protein or protein-lipid  
44 tethers which maintains distancing of 30 nm between interacting membranes. MCSs have  
45 been found in almost every pair of organelles (1), most of which involving the endoplasmic  
46 reticulum (ER) as its membrane spans a network that interacts with the plasma

47 membrane, and other organellar membranes such as those of the Golgi apparatus,  
48 lysosomes, endosomes, lipid droplets, peroxisomes, and mitochondria (2). MCSs are also  
49 reported between other organelle pairs such including the peroxisomes and lipid droplets,  
50 and the mitochondria and vacuoles/endosomes/lysosomes, plasma membrane, lipid  
51 droplets, and peroxisomes respectively, notwithstanding the contact sites between the  
52 inner and outer mitochondrial membranes (3). These contact sites mostly harbor proteins  
53 involved in lipid metabolism and transport, making them hubs of lipid transfer between  
54 interacting membranes. However, other processes associated with MCSs have been  
55 reported and they include ion transport and homeostasis, apoptosis (1), and endosomal  
56 (4) and mitochondrial (5) fission, respectively.

57         We recently identified several key molecules that facilitate membrane contact sites  
58 in mitosomes, endosomes, and Golgi apparatus of *Entamoeba histolytica*, and aimed to  
59 study their roles and possible link to the parasitic nature of this amoeba. *E. histolytica* is  
60 an anaerobic unicellular protozoan parasite that infects the large intestine of humans, and  
61 causes amebiasis, a disease characterized by diarrhea, which is a major cause of death  
62 in children worldwide. Millions of individuals are infected; mostly in developing countries  
63 and the disease causes an estimated 100,000 deaths annually (6). Infection begins by  
64 the ingestion of infectious cysts, which are resistant to the acidic environment of the  
65 stomach, then cysts pass through the small intestine, and undergo excystation within the  
66 terminal ileum or colon, to the trophozoite stage. Trophozoites reproduce and encyst  
67 within the colon, where they are released in the environment via excretion of feces, thus  
68 completing one cycle of the fecal-oral transmission (Stanley, 2003). Invasive amoebic  
69 trophozoites destroy the muco-epithelial barrier of the host intestinal tract, inducing mucus

70 overproduction, inflammation and dysentery. It could lead to the formation of extra-  
71 intestinal abscesses particularly in the liver (amoebic liver abscess), lungs, and brain. The  
72 virulence of this parasite is due to its ability to inflict damage to host cells and tissues, via  
73 parasite attachment to colonic epithelial cells, protease secretion to damage host cells  
74 and evade host immune response, and by ingestion of host cells via phagocytosis and  
75 trogocytosis. These processes involve intracellular trafficking and inter-organelle  
76 crosstalk, underscoring the role of vesicular transport and membrane contact sites  
77 (MCSs) not only in parasite biology but also in its virulence and pathogenesis.

78 Like other anaerobic parasitic protozoans, *E. histolytica* lacks canonical  
79 mitochondria, and instead has a highly divergent mitochondrion-related organelle (MRO)  
80 called mitosome. *Entamoeba* mitosomes contribute to parasitism (7) due to a  
81 compartmentalized sulfate activation pathway that leads to the formation of cholesteryl  
82 sulfate in the cytosol. This molecule induces stage conversion from the trophozoite to cyst  
83 form (8) a process that is essential for maintaining the parasite's life cycle and mode of  
84 disease transmission. Apart from mitosomes, other amoebic organelles such as the ER  
85 and the Golgi apparatus also show less defined structural and compositional features  
86 compared with model organisms, however, they have been shown to contain orthologs  
87 of established endomembrane proteins (9–11). Our knowledge on MCSs in *Entamoeba*  
88 is extremely limited, with only the previously identified mitochondrial membrane proteins  
89 ETMP30 (reported to interact with a Golgi-localized protein secretory pathway calcium  
90 ATPase) and EHI\_099350 (reported to have dual localization in the mitosomes and the  
91 ER) (12–14). Other molecules that participate in tethering of these compartments and  
92 what roles these contact sites play in the cell are still unknown, making it imperative to



93 dissect amoebic MCSs. These past observations point to the fact that mitosomes,  
94 although highly degenerate, are able to interact with other organelles in the cytoplasm,  
95 and such contacts often utilize lineage-specific membrane. Here we identified another  
96 mitochondrial membrane protein, ETMP1 which interacts with a C-terminal Eps15 homology  
97 domain (EHD) containing protein, a member of the EHD protein superfamily involved in  
98 various endocytic processes. Studies on *E. histolytica* organelle interaction via the  
99 endocytic transport mechanism has accumulated over several decades, including  
100 proteins involved in cargo sorting regulation and endosome dynamics such as Rab  
101 GTPases (15) and endosomal sorting complex required for transport (ESCRT) proteins  
102 (16, 17). However, there are so far no reports on whether these molecules take part in  
103 MCS between endosomes and other parts of the cell.

104

## 105 **Results**

### 106 ***EHI\_175060 is a lineage-specific mitochondrial membrane protein***

107 Our group previously searched for transmembrane domain-containing mitochondrial  
108 proteins using a previously-developed prediction pipeline (12) in sought for proteins that  
109 could be lineage-specific receptors, channels, enzymes, and components of the import  
110 machinery or otherwise uncharacterized complexes on the outer and inner membranes  
111 of *Entamoeba histolytica* mitosomes. This resulted in the prediction of 25 protein  
112 candidates. Like the other 24 proteins in the list (12), EHI\_175060 is unique to the lineage  
113 *Entamoeba*. Figure 1 shows a multiple sequence alignment of the protein sequence of  
114 EHI\_175060 with that of its orthologs in other *Entamoeba* species (*E. moshkovskii*, *E.*  
115 *dispar*, and *E. nuttalli*). The protein has a predicted molecular mass of 29.5 kDa, and it

116 contains two coiled-coil domains at the middle portion and a single transmembrane  
117 domain near the carboxyl terminus. It also lacks a predictable canonical N-terminal  
118 targeting sequence. Based on these characteristics, we name EHI\_175060, as  
119 *Entamoeba*-specific transmembrane mitochondrial protein 1 (ETMP1).

### 120 ***ETMP1 is localized to mitochondrial membranes***

121 To validate the predicted localization of ETMP1, we expressed amino terminus  
122 hemagglutinin (HA)-tagged fusion protein, HA-ETMP1, in amoebic trophozoites and  
123 confirmed protein expression by Western blot analysis. The anti-HA immunoblot showed  
124 a single band corresponding to the expected molecular mass of HA-ETMP1 (Figure 2A).  
125 We then analyzed the localization of the protein by immunofluorescence assay (IFA;  
126 Figure 2B). Co-staining of HA-ETMP1 expressing strain using anti-HA antibody and anti-  
127 adenosine-5'-phosphosulfate kinase (APSK; EHI\_179080; a mitochondrial matrix enzyme  
128 involved in sulfate activation) antiserum revealed good colocalization of the HA-tagged  
129 protein to mitochondria containing APSK. This is supported by the Pearson correlation R  
130 value which ranges between 0.31 to 0.59, suggesting that HA-ETMP1 is localized to  
131 mitochondria. Furthermore, we also performed Percoll-gradient fractionation of HA-ETMP1  
132 homogenate and found that fractions containing HA-ETMP1 showed broad distribution in  
133 the first ultracentrifugation, suggesting some proteins are localized to the cytosol/lighter  
134 fractions. However, HA-ETMP1 also exists in the bottom fractions which overlap with  
135 those that contain chaperonin 60 (Cpn60; EHI\_178570; a chaperone protein and  
136 canonical mitochondrial matrix marker). The co-fractionation of HA-ETMP1 to mitochondria  
137 was suggested by the anti-HA and anti-Cpn60 immunoblots of both the first and second  
138 ultracentrifugation respectively (Figure 2C). We also performed subcellular fractionation

139 followed by carbonate treatment, to further assess the localization, as well as membrane  
140 integration of HA-ETMP1. The fractionation profile of HA-ETMP1 after immunoblot  
141 analysis (Figure 2D, upper panel) showed that it is present in both cytosolic and organelle  
142 fractions. Also, it was clearly demonstrated that the HA-ETMP1 contained in the  
143 organellar membrane-enriched fraction, is integrated to organellar membranes as it was  
144 retained in the particulate fraction after carbonate treatment, similar to MBOMP30-HA  
145 (Figure 2D, middle panel), a positive control for mitochondrial membrane protein. These  
146 carbonate fractionation profiles contrast with that of the soluble mitochondrial matrix protein  
147 marker Cpn60, as shown by the blot stained with anti-Cpn60 antiserum (Figure 2D,  
148 bottom panel).

149 We also performed immunoelectron microscopy analysis, and the results indicated  
150 that HA-ETMP1 is localized to the mitochondrial membranes, as anti-HA gold particles are  
151 found along the periphery of the Cpn60-labeled mitochondria (Figure 2E). Particle  
152 distribution analysis of the gold-conjugated antibodies revealed a significant difference in  
153 the staining of mitochondria ( $368 \pm 279/ \mu\text{m}^2$ ) compared to cytosol ( $22.3 \pm 9.25/ \mu\text{m}^2$ ) by  
154 anti-HA gold. The distribution of the mitochondrial marker APSK as detected by the gold anti-  
155 APSK particles was also significantly higher in mitochondria ( $192 \pm 98.1/ \mu\text{m}^2$ ) than in the  
156 cytosol ( $0.984 \pm 0.817/ \mu\text{m}^2$ ). Statistical significance in both datasets was analyzed using  
157 two-tailed Welch's unequal variance t-test ( $n = 17, p < 0.0001$ ). Overall, these data  
158 provide evidence of mitochondrial membrane localization of ETMP1.

### 159 ***ETMP1 is essential and its overexpression causes drastic growth defect***

160 We made several attempts at silencing the *etmp1* gene by small-RNA  
161 transcriptional interference, all of which failed as the transformants did not survive drug

162 selection, suggesting its essentiality to the parasite. We also observed a slower growth  
163 rate in HA-ETMP1 expressors compared with mock control. Analysis of growth kinetics  
164 of the two strains at varying concentrations of geneticin (G418) suggest a dose-  
165 dependent effect of drug concentration to the growth of amebic trophozoites (Figure 3A),  
166 and protein expression respectively (Figure 3B).

### 167 ***ETMP1 interacts with EH-domain containing proteins***

168 To shed light on the function of ETMP1, we next attempted to identify its interacting  
169 partner(s) by immunoprecipitation (IP). Anti-HA agarose beads were used to  
170 immunoprecipitate the bait protein together with its binding partner(s) from the organelle-  
171 rich fraction of HA-ETMP1-expressing and mock control strains respectively. Western  
172 blotting with anti-HA antibody confirmed successful binding to and elution from HA-  
173 ETMP1 with respect to the anti-HA beads (Figure 4A). Silver staining of the SDS-PAGE  
174 gel containing HA peptide-eluted fractions revealed a band corresponding to  
175 approximately 55 kDa that is uniquely precipitated in HA-ETMP1 (absent in the mock-HA  
176 control) (Figure 4B). Protein sequencing analysis by mass spectrometry followed by  
177 differential comparison of quantitative values (QVs), normalized with unweighted  
178 spectrum counts between HA-ETMP1 and mock-HA control identified interacting partners  
179 of ETMP1 (Figure 4C). A cutoff of QV >2.0 in the HA-ETMP1 over the mock-HA sample  
180 was used, yielded four candidates, three of which were exclusively detected in the eluted  
181 IP fraction of HA-ETMP1. Also, three of the four candidates were identified in the  
182 mitosome proteome that was previously published (18), namely, L-myo-inositol-1-  
183 phosphate synthase (EHI\_070720), EH-domain (EHD) containing protein 1 (annotated as

184 receptor mediated endocytosis protein; EHI\_105270) and its close homolog, EHD2  
185 (EHI\_152680).

186 We also performed Blue Native (BN)-PAGE analysis to assess whether ETMP1 is  
187 part of a protein complex. Anti-HA immunoblot analysis of BN-PAGE run samples  
188 indicated that HA-ETMP1 forms complexes of about 90 kDa and 180 kDa respectively  
189 (Figure 4D). Protein sequencing analysis of the excised silver-stained BN-PAGE bands  
190 containing these two complexes identified numerous proteins. Similarly, we set a cutoff  
191 value of >2.0 and the list of proteins are found in Supplementary Table S1A-C. Notably,  
192 EHD1 and its close homolog EHD3 (97% identical) were identified in both the 90 and 180  
193 kDa complex bands. Thus, we regarded EHD1 as one of the potential interacting partners  
194 of ETMP1.

195 ***EHD1 is an ETMP1-interacting protein that is localized to mitosomes and to***  
196 ***vesicles of varying sizes***

197 We expressed EHD1 in amoeba trophozoites with HA-tag at the amino terminus,  
198 as confirmed by the anti-HA immunoblot result showing a band corresponding to the  
199 expected molecular mass of HA-EHD1 (~61 kDa) (Figure 5A). To analyze and confirm  
200 the mitosomal localization of EHD1, we performed double-staining IFA on HA-EHD1  
201 expressing strain with anti-HA antibody and anti-APSK antiserum. We observed that the  
202 anti-HA signal is mostly localized to the membrane of vesicles of various sizes (Figure  
203 5B). We could also notice a few punctate anti-HA signals which colocalized with the anti-  
204 APSK mitosome marker (Figure 5C, white arrowheads). Although minimal colocalization  
205 between anti-HA and anti-APSK signals were observed, some anti-APSK signals were  
206 notably seen near the vesicle membranes marked with HA-EHD1 (Figure 5C, white

207 arrow). Immunoelectron analysis (Figure 5D) corroborate the IFA observations, as we  
208 observed mostly vesicular membrane staining of anti-HA gold particles (left panel), with  
209 occasional signals on mitosomal membranes (middle panel), some of which showed  
210 close proximity to vesicular membranes (right panel). Furthermore, immunoblot analysis  
211 of Percoll-gradient fractions indicated wide distribution of HA-EHD1 across various  
212 densities, mostly in fractions 9 to 10 and with weaker intensity in fractions 12 to 22 of the  
213 first ultracentrifugation, and in fractions A to N in the second ultracentrifugation (Figure  
214 5E), validating the microscopic observations of HA-EHD1 vesicular and mitosomal  
215 localization.

216 As majority of the signals of HA-EHD1 appear on vesicles, we next characterized  
217 the vesicles marked by HA-EHD1 by performing co-staining IFA using anti-HA antibody  
218 and one of the following antisera respectively: anti-vacuolar protein sorting 26 (Vps26),  
219 anti-pyridine nucleotide transhydrogenase (PNT), and anti-Rab11B. Most of the anti-HA-  
220 stained vesicles were colocalized with anti-Vps26- rather than anti-PNT- and anti-  
221 Rab11B-stained vesicles (Figure 6A) as supported by the Pearson correlation R value  
222 ranges of 0.22 to 0.37 for anti-Vps26, -0.16 to 0.19 for anti-PNT and 0.12 to 0.01 for anti-  
223 Rab11B, respectively. Vps26 is a retromer complex component and is a marker of  
224 endosomes/phagosomes in *E. histolytica* (19, 20). PNT is localized to the membrane of  
225 numerous vesicles/vacuoles, including lysosomes and phagosomes (21), while Rab11B  
226 was demonstrated to partially colocalize with late endosomes (22). Together, these data  
227 suggest EHD1 is mostly localized to endosomal membranes which may contain Vps26  
228 and to some extent PNT, but not Rab11B.

229 ***HA-EHD1 is weakly associated to organellar membranes and preferentially binds***  
230 ***to PI(3,5)P<sub>2</sub> and PI(4,5)P<sub>2</sub>***

231 We performed a similar carbonate fractionation assay to the organelle-enriched  
232 fraction of HA-EHD1 expressing strain. Based on the anti-HA immunoblots, HA-EHD1  
233 was exclusively contained in the organelle fraction, as compared to that of the anti-CS1  
234 profile which represents cytosolic fraction (Figure 6B). Next, we also assessed membrane  
235 integration of HA-EHD1 by carbonate treatment of the organelle-enriched fraction.  
236 Results of the immunoblots showed that HA-EHD1 is not membrane-bound as compared  
237 to the lysosomal membrane protein marker CPBF1 (Figure 6B). Instead, the profile is  
238 similar to that of the blot immunostained with an antiserum targeting Sec13, a peripheral  
239 ER membrane protein (Figure 6B). This suggests that HA-EHD1 is not organellar  
240 membrane-integrated, rather is weakly organellar membrane-associated.

241 To validate and characterize the phospholipid binding capacity of EHD1, we  
242 carried out a lipid overlay assay using lysates of HA-EHD1 and HA-SNX1 (PI3P binding  
243 protein control) respectively. Results indicated preferential binding of HA-EHD1 to  
244 phosphoinositide diphosphates, specifically PI(3,5)P<sub>2</sub> and PI(4,5)P<sub>2</sub> (Figure 6C).

245 ***Overexpression of HA-EHD1 demonstrated enhanced multivesicular body (MVB)***  
246 ***formation***

247 We also expressed HA-EHD1 under the control of tetracycline (tet) induction. IFA  
248 analysis of HA-EHD1 showed the protein is similarly localized to membranes of various  
249 vesicles after 1 h and 3 h of tet induced expression respectively (Figure 7A upper and  
250 middle panel). However, at 24 h post induction with tet, we noticed drastic changes in the  
251 localization as well as in the overall intracellular vesicular patterns of expressing

252 trophozoites (Figure 7A bottom panel), wherein large multivesicular bodies (MVBs) that  
253 were also marked with anti-HA signal were observed (Supplementary Movie S1). These  
254 findings were also supported by immunoelectron micrographs, showing  
255 immunodecoration of gold anti-HA particles along the membranes of MVBs, including the  
256 neck of invaginated vesicles (Figure 7B), after 24 h of tet-induced expression of HA-EHD1.  
257 These data point to the involvement of EHD1 in the biogenesis of MVBs in *E. histolytica*.  
258 ***EHD1 is involved in early endosome formation during macropinocytosis and***  
259 ***receptor-mediated endocytosis***

260 To further characterize the vesicles whose membranes are associated with EHD1,  
261 we performed endocytosis assay using either dextran conjugated to rhodamine B  
262 isothiocyanate (RITC) (for bulk endocytosis and macropinocytosis) as well as transferrin  
263 conjugated to Alexa Fluor-568 (for receptor-mediated endocytosis) respectively, as  
264 substrates, which were chased by live (GFP-EHD1 and mock-GFP) or fixed (HA-EHD1  
265 and mock-HA) imaging analysis of treated strains. Expression of GFP-EHD1 was  
266 confirmed as a single band after anti-GFP immunoblotting (Figure 8A). From imaging of  
267 live GFP-EHD1, we observed that the GFP signals are evenly spread on round  
268 endosomal membranes (Figure 8B left panel). However, signal polarization occurs on  
269 portions where there is contact between two endosomes (Supplementary Movie S2). We  
270 also observed localization of GFP-EHD1 in endosomes that contain either RITC-dextran  
271 and Alexa Fluor 568-transferrin (Figure 8B middle and right panels respectively). Our  
272 observations also revealed that EHD1 is involved in early endosome formation during  
273 macropinocytosis of RITC-dextran. Membranes of newly formed vesicles after ingestion  
274 of RITC-dextran initially did not contain EHD1 but several seconds later, GFP-EHD1



275 showed intense signal on the membrane of the enclosing early endosome  
276 (Supplementary Movie S3). Consistent with this, we also noticed a similar phenomenon  
277 of GFP-EHD1 recruitment in closing early endosomes when Alexa Fluor-568-transferrin  
278 was used as substrate (Supplementary Movie S4). In addition, we observed accumulation  
279 of transferrin on to certain spots in the plasma membrane which showed remarkably high  
280 GFP-EHD1 signal (Supplementary Movie S5). This suggests that EHD1 is also involved  
281 in intra-vesicular traffic of transferrin with some aggregate signals localized near the PM,  
282 likely hinting at its involvement in receptor or membrane recycling.

### 283 ***HA-EHD1 is localized to phagosome and trophosome membrane***

284 To further characterize EHD1-containing vesicles, we performed phagocytosis  
285 assay by co-incubating expressing trophozoites with CellTracker Blue-stained Chinese  
286 hamster ovary (CHO) cells. Live and fixed-cell imaging analyses of phagosomes or  
287 trophosomes containing whole, or bites of CHO cells, respectively were observed at  
288 varying time points after co-incubation. We observed association of either GFP-EHD1 or  
289 HA-EHD1 on some phagosome and trophosome membranes (Figure 9). We also noticed  
290 patches of higher intensity signals on certain regions of contact between phago- or  
291 trophosomes and other vesicles in both fixed (Supplementary Movie S6) and live  
292 (Supplementary Movie S7) cell imaging analyses. IFA images also suggest that HA-EHD1  
293 is localized at the phagocytic cup/tunnel suggesting its involvement in early phagosome  
294 formation (Figure 9 top panel; 15 min post co-incubation). Also observed in fixed cells was  
295 the localization of HA-EHD1 on the trophosome membrane that appears to undergo  
296 tubulation (Figure 9, bottom panel; 60 min post co-incubation).

### 297 ***Recombinant His-EHD1 demonstrated ATPase activity in vitro***

298 We also expressed amino terminus histidine (His)-tagged *E. histolytica* EHD1 in  
299 bacteria to assess its enzymatic activity in vitro. We purified His-EHD1 using nickel-  
300 nitriloacetic acid (Ni-NTA)-agarose beads as shown by the Coomassie Brilliant Blue-  
301 stained SDS-PAGE gel, as well as the anti-His antibody-stained PVDF membrane (Figure  
302 10A), containing representative Ni-NTA purification fractions. Eluted fraction of purified  
303 His-EHD1 demonstrated ATPase activity (Figure 10B) with a Michaelis-Menten constant  
304 ( $K_m$ ) value of  $94.91 \pm 16.63 \mu\text{M}$  and a maximum velocity ( $V_{\text{max}}$ ) of  $9.85 \pm 0.37$   
305  $\mu\text{mole}/\text{min}/\text{mg}$ .

306

## 307 **Discussion**

308 We have verified our prediction of ETMP1 being localized to the mitosomal  
309 membrane by imaging and fractionation analyses. The gene encoding for this protein is  
310 essential to the parasite's proliferation as indicated by the failure of transfected  
311 trophozoites to survive sublethal concentration of drug pressure, compared with those  
312 transfected with an empty vector control. Previous attempts at silencing the genes  
313 encoding other mitosomal membrane proteins such as Tom40 (23) and MBOMP30 (24)  
314 also failed, suggesting the essential role that these proteins, and the mitosome itself  
315 where they exclusively localize, maintain in the proliferation of *E. histolytica*.  
316 Overexpression of ETMP1 also affected the growth rate of the parasite negatively. This  
317 may be due to the disruption of tight regulatory mechanisms for maintaining mitosomal  
318 homeostasis and/or formation of toxic protein aggregates. It could also be due to the  
319 stoichiometric imbalance of HA-ETMP1-containing protein complexes. Our BN-PAGE  
320 analysis identified ETMP1 in the 90kDa and 180 kDa complexes respectively, whose

321 formation, compositional ratios, and biological functions may be sensitive to ETMP1  
322 overexpression.

323 HA-ETMP1 immunoprecipitated a unique ~55 kDa protein. Mass spectrometry  
324 analysis of the excised silver-stained gel band indicated several candidates including EH-  
325 domain containing protein (EHD1; EHI\_105270; 58 kDa) and its ortholog (EHD2;  
326 EHI\_152680; 58 kDa) sharing 82% identity, vacuolar protein sorting-associated protein  
327 45 (60 kDa; EHI\_154290), and L-myo-inositol-1-phosphate synthase (57 kDa;  
328 EHI\_070720). Incidentally, when we sequenced the complex band of 90 and 180 kDa  
329 BN-PAGE complex bands that include HA-ETMP1, we identified EHD1 and its close  
330 homolog EHD3 (EHI\_052870; 58 kDa) with 97% identity. From these data, we deduced  
331 a plausible interaction between ETMP1 and EH domain containing proteins, with a focus  
332 on EHD1 in this paper. Repeated multiple attempts at immunoprecipitating the said  
333 complexes failed. One possibility is that the topology of HA-ETMP1 in the complex  
334 blocked the HA epitope tag from binding to the anti-HA beads. We also performed IP  
335 using HA-EHD1 (Supplementary Figure S1, Supplementary Table S2A), however our  
336 protein sequencing analysis of the ~30-37 kDa excised band did not detect HA-ETMP1  
337 (Supplementary Table S2B), suggesting the likely transient nature of this protein binding.  
338 The detection of amoebic EHD isotypes in the pull-down and BN-PAGE complexes of  
339 HA-ETMP1 respectively, suggests potential interaction among these EHD homologs. It is  
340 also plausible that amoebic EHDs form hetero-dimers or hetero-oligomers as was  
341 demonstrated by mouse EHD1 and EHD3. The interaction between mouse EHD1 and  
342 EHD3 is likely involved in the regulation of recycling endosomes movement along  
343 microtubules (25). In *E. histolytica*, such EHD oligomers may be involved not only during

344 endocytosis but may also exist during the formation and maintenance of the mitosome-  
345 endosome contact. Compositional variations of EHD homo- or hetero-oligomers may also  
346 exist, and their corresponding functions may be stoichiometry-dependent.

347 EHDs have been associated to play roles in various endocytic processes. In one  
348 subset known as the C-terminal EHDs, four paralogues are present in mammals, namely  
349 EHD1, EHD2, EHD3, and EHD4. Mammalian EHD1 regulates exit of proteins from the  
350 endocytic recycling compartment to the plasma membrane, while both EHD1 and EHD3  
351 have similar roles in controlling early endosome to Golgi transport (26, 27). Mammalian  
352 EHD2 localizes to caveolae and together with the Bin Amphiphysin Rvs (BAR)-domain  
353 containing binding partner PACSIN2, stabilizes caveolae at the cell surface (28), whereas  
354 mammalian EHD4 facilitates macroendocytic uptake of tropomyosin receptor kinase (Trk)  
355 receptors (29). EHDs are also implicated in the regulation of endocytic pathways  
356 associated with lipid metabolism. Mammalian EHD1 is involved in cholesterol  
357 homeostasis, affecting generation of cholesterol and triglyceride lipid bodies (30).

358 EHDs also regulate endocytosis in other organisms including plants, worms, and  
359 protozoans. *Arabidopsis thaliana* has two EHD paralogs, *AtEHD1* and *AtEHD2*.  
360 Downregulation of *AtEHD1* led to a deficiency in the entry of endocytosed material into  
361 plant cells, whereas overexpression of *AtEHD2* caused an inhibitory effect on endocytosis,  
362 suggesting both proteins are important components in plant endocytic machinery (31).  
363 The EHD ortholog in *Caenorhabditis elegans*, receptor-mediated endocytosis 1 (*Rme1*),  
364 localizes to the endocytic recycling compartment and mediates the exit of cargo proteins  
365 to the cell membrane (32). In the protozoan parasite that causes malaria, *Plasmodium*  
366 *falciparum*, a single EHD protein is encoded in its genome. *PfEHD* is involved in

367 endocytosis and plays a role in the generation of endocytic vesicles at the plasma  
368 membrane, that are subsequently targeted to the neutral lipid generation/storage site  
369 localized near the food vacuole (33). In the free-living amoebozoan *Dictyostelium*  
370 *discoideum*, a single gene encoding EHD protein was identified. *DdEHD* was determined  
371 to be involved in phagosome maturation, and its deletion resulted to defects in  
372 intraphagosomal proteolysis and acidification, early delivery of lysosomal enzymes, and  
373 fast retrieval of the vacuolar H<sup>+</sup>-ATPase in maturing phagosomes (34).

374 We have shown that *EhEHD1* is involved in various endocytic processes. Our live  
375 imaging analysis showed involvement of *EhEHD1* in early endosome formation,  
376 particularly during closure of newly-formed endosomes after engulfment of either RITC-  
377 dextran (Supplementary Movie S3) or Alex568-transferrin (Supplementary Movie S4),  
378 suggesting that *EhEHD1* may participate in the scission of early endosomes generated  
379 from macropinocytosis as well as receptor-mediated endocytosis. Vesicle tubulation and  
380 scission are associated roles of EHDs as they possess a dynamin-like ATPase domain  
381 as demonstrated previously in (34–37).

382 Our in vitro enzyme assay showed that His-EHD1 has ATPase activity with a Km  
383 value of  $94.91 \pm 16.63 \mu\text{M}$  as compared to the previously reported Km values for mouse  
384 EHD1 (80  $\mu\text{M}$ ) and CeRME1 (30- $\mu\text{M}$ ) (38). We also attempted to investigate the role of  
385 ATPase activity of EHD1 in *E. histolytica* by expressing ATPase-deficient dominant  
386 negative mutant, however the transfectants did not survive drug selection, suggesting the  
387 importance of EHD1 ATP hydrolysis in amoebic biology. Based on other works, ATPase  
388 activity of C-terminal EHD-containing proteins is crucial for various stages of the endocytic  
389 traffic machinery. Hydrolysis of ATP was essential for binding of human EHD2 complexes

390 to caveolae during clathrin-independent endocytosis (39). It is suggested that membrane  
391 scission results from ATP hydrolysis by human EHD2 in vivo (35). Using cross-  
392 complementation assays in *C. elegans*, ATP binding and hydrolysis of human EHD1 was  
393 essential for endocytic recycling. It was also shown using in vitro liposome-based assays  
394 that ATP binding of human EHD1 promote scaffold self-assembly, while ATP hydrolysis  
395 enables extension of bulges and thinning of tubular model membranes which leads to  
396 scission (40). In vitro analysis also revealed that ATP binding and concomitant hydrolysis  
397 allows membrane remodelling into highly curved tubules (29). We can only hypothesize  
398 that ATP hydrolysis in amoebic EHD1 may have functions similar to its homologs in other  
399 organisms.

400 We also detected *EhEHD1* in the phagocytic cup, and membranes of phagosomes  
401 and trophosomes, although only a select few phagosomes and trophosomes are labeled  
402 with *EhEHD1* in both live and fixed imaging analysis. The same can also be said when  
403 we performed endocytosis assay using either RITC-dextran or Alexa Fluor 568-transferrin.  
404 This suggests the nature of EHD localization being dependent on either recruitment by  
405 interacting proteins or association/binding with certain lipids on vesicular membranes at  
406 specific time points. This is reflected by the localization of either GFP-EHD1 or HA-EHD1  
407 in membranes of vesicles of various sizes, and the seemingly polarized signal intensity  
408 onto sites where two vesicles are in close contact.

409 As suggested by our lipid overlay assay result, *EhEHD1* preferentially binds to  
410 PI(3,5)P<sub>2</sub> and PI(4,5)P<sub>2</sub>. PI(4,5)P<sub>2</sub> has been demonstrated to be localized to the plasma  
411 membrane (41), lipid rafts and uroids (42) of *E. histolytica*. It is important to note that  
412 PI(4,5)P<sub>2</sub> localized at the plasma membrane is involved initiating internalization during

413 endocytosis, micropinocytosis, and phagocytosis (43, 44), whereas PI(3,5)P2 has a  
414 critical role in endosome/lysosome biogenesis, and in the initiation of MVB formation (45).  
415 Together, these results circumstantially support our observations of amoebic EHD1  
416 localization and involvement in early endosome, intraluminal vesicle, and MVB formation.

417 On the possible role(s) of mitosome-endosome contact in *E. histolytica*, we posit  
418 that this MCS may be involved in lipid transfer, ion transport, and quality control. Lipid  
419 transport and/or metabolism are commonly alluded roles of MCSs. Although we did not  
420 detect any lipid transport proteins in our immunoprecipitation assay, two lipid transport  
421 proteins (LTP1 and LTP3) in *E. histolytica* have been characterized (46), and it is plausible  
422 that various LTPs may transiently interact with amoebic MCSs to facilitate lipid mobility  
423 across organelles. We detected a few fatty acid ligases in the ~90 and ~180 kDa complex,  
424 however the interaction of these proteins to the HA-ETMP1 containing complex needs to  
425 be experimentally validated. Alternatively, ion transport may also be facilitated in this MCS,  
426 as was demonstrated in epithelial cells, where the mitochondria and endosomes that  
427 contain iron-bound transferrin are involved in “kiss and run” interactions, leading to iron  
428 transfer from endosomes to mitochondria (47). Another possibility is the involvement of  
429 EHD1 in mitosomal dynamics. Mitochondria undergo dynamics of fusion and fission to  
430 ensure maintenance of homeostasis, control of reactive oxygen species, apoptosis, and  
431 autophagy. Dynamin and dynamin related proteins (Drps) have been implicated in  
432 mitochondrial fission. Recently in HeLa cells, EHD1 was reported to be a novel regulator  
433 of mitochondrial fission via a mechanism distinct from that of dynamin/Drp. In this model  
434 human EHD1, together with its binding partner rabankyrin-5 interact with the retromer  
435 complex participate in mitochondrial division. EHD1 was suggested to facilitate the fission

436 of vesicles that transport Vps35, a retromer complex component, from endosomes to the  
437 mitochondrial membrane. It was also suggested that Vps35 may interact with inactive  
438 Drp1 on the mitochondrial membrane, causing its removal and subsequent action of  
439 active Drp1 to perform mitochondrial fission (48). Fission has also been reported in MROs  
440 of anaerobic parasites such as the hydrogenosomes of *Trichomonas vaginalis* and *E.*  
441 *histolytica* (49–51). Mitosome fission in *E. histolytica* was reported to involve a  
442 heterodimer complex of two dynamin-related proteins, DrpA and DrpB (50). It is  
443 interesting if amoebic EHD1 also takes part in influencing mitosome fission as was  
444 postulated in mammalian cells (48). An alternative novel pathway for mitochondrial quality  
445 control that is independent of Atg5 and LC3 is the formation of mitochondria-derived  
446 vesicles targeted to lysosomes. Ultrastructural analysis of COS7 cells identified the  
447 presence vesicles that are Tom20-positive within MVBs (52). Furthermore, in hepatocytes,  
448 a complex made up of EHD2, EH domain binding protein 1 (EHBP1), and Rab10,  
449 promotes extension of the LC3-containing autophagic membrane in order to engulf lipid  
450 droplets during lipophagy (53). Such related pathways may also exist in *E. histolytica* that  
451 warrants further investigation in the future.

452

## 453 **Conclusion**

454 We report a novel membrane contact site between mitosomes and endosomes of  
455 *Entamoeba histolytica*. This unprecedented MCS features the mitosomal membrane  
456 protein ETMP1 and a C-terminal EH domain containing protein, EHD1. ETMP1 is a  
457 protein unique to *Entamoeba* and is essential to parasite proliferation. It interacts with  
458 EHD1, a protein involved in various endocytic processes in *E. histolytica*, namely in early



459 endosome formation during bulk and receptor-mediated endocytosis, phagocytosis and  
460 trogocytosis of mammalian cells, and in the invagination of intraluminal vesicles for the  
461 generation of multivesicular bodies. Such novel ETMP1-EHD1 interaction hints at a  
462 possible role of this mitosome-endosome MCS on various physiological processes that  
463 have been demonstrated in other organisms. We thus propose that ETMP1-EHD1  
464 mediated contact site is involved in lipid transfer, biogenesis, autophagy, organelle  
465 dynamics and quality control of MROs. Further investigation is needed to fully dissect the  
466 molecular mechanisms and functions of this and other MRO-related MCSs.

467

## 468 **Materials and Methods**

### 469 ***Entamoeba histolytica* cultivation**

470 *Entamoeba histolytica* HM-1:IMSS Cl6 (54) and G3 (55) strains were maintained  
471 in Diamond's BI-S-33 medium (54) as described previously. Subculture was performed  
472 after incubation of up to 3-4 days when trophozoites reached the late-logarithmic phase.

### 473 **Plasmid construction**

474 Extraction of total RNA from *E. histolytica* trophozoites, purification of mRNA, and  
475 synthesis of cDNA were performed by following protocols described previously (24). For  
476 the expression of hemagglutinin (HA) tagged proteins in *E. histolytica* trophozoites, target  
477 genes (*etmp1*: EHI\_175060 and *ehd1*: EHI\_105270) were amplified by polymerase chain  
478 reaction (PCR) using *E. histolytica* cDNA as template, and the corresponding primer sets:

479 (*etmp1*-*Xma*I-fwd: GTTcccgggATGGAACAAATAACTGAAGAA; *etmp1*-*Xho*I-rev:

480 GAActcgagTTATTTTTTCATTTTTCTTAAGG; and *ehd1*-*Xma*I-fwd:

481 GTTcccgggATGTTTGGTAAGAAGAAACAAAACC; *ehd1*-*Xho*I-rev:

482 GAActcgagTTATTCAACTGGTGGGAAGATTGTC). These PCR amplicons were inserted  
483 into the following plasmids: pEhEx-HA and pEhEx-GFP for constitutive expression, (56)  
484 and pEhtEx-HA and pEhtEx-GFP for tetracycline-induced expression (50), after digestion  
485 with *Xma*I and *Xho*I (New England Biolabs, Beverly, MA, USA) and then ligated using  
486 Ligation Convenience Kit (Nippongene, Tokyo, Japan). For the expression of recombinant  
487 proteins in *Escherichia coli*, PCR-amplification of *ehd1* was performed using *E. histolytica*  
488 cDNA as template and the following primer set (*ehd1*-*Bam*HI-fwd:  
489 GTTgatccATGTTTGGTAAGAAGAAACAAAACC, and *ehd1*-*Sall*-rev:  
490 GAAgtcgacTTATTCAACTGGTGGGAAGATTGTC). Digestion and ligation to *Bam*HI and  
491 *Sall*-linearized pColdI plasmid (Takara, Shiga, Japan) were performed. For transcriptional  
492 gene silencing, about 400 bp fragments of *etmp1* and *ehd1* were amplified using cDNA  
493 and appropriate primer sets: *etmp1*gs-*Stu*I-fwd: GTTaggcttATGGAACAAATAACTGAAG;  
494 *etmp1*gs-*Sac*I-rev: GAAgagctcCTAATTTGATTCCTTTTAAAG; and *ehd1*gs-*Stu*I-fwd:  
495 GTTaggcctATGTTTGGTAAGAAGAAACAA and *ehd1*gs-*Sac*I-rev:  
496 GAAgagctcTAAATTTAGCCATAAATTCAT. The amplicons were digested with *Stu*I and  
497 *Sac*I and ligated to pSAP2-Gunma (57).

#### 498 **Amoeba transfection and drug selection**

499 The constructed plasmids described above were transfected by lipofection into *E.*  
500 *histolytica* trophozoites, as described previously (58, 59). Selection of transfectants was  
501 performed by changing the culture medium supplemented with G418 (Gibco/Life  
502 Technologies, USA) for those transfected with pEhEx-based plasmids, or with  
503 hygromycin (Fujifilm Wako, Japan) for those transfected with pEhtEx-based plasmids.  
504 The starting concentration of either 1 µg/mL G418 or hygromycin added was gradually

505 increased until all control cells (transfected without plasmid) died from the antibiotic  
506 challenge. All resultant strains were maintained in medium containing 10 µg/mL G418 or  
507 20 µg/mL hygromycin unless otherwise stated. For tetracycline-induction of protein  
508 expression, 10 µg/mL tetracycline was added to semi-confluent cultures 24 h prior to  
509 performing assays unless otherwise stated.

### 510 **Immunofluorescence assay (IFA)**

511 Double-staining immunofluorescence assay was performed as previously  
512 described (13), using anti-HA mouse monoclonal antibody (clone 11MO, Covance, USA)  
513 diluted 1:500 in 2% saponin and 0.1% bovine serum albumin in phosphate buffered saline  
514 (saponin-BSA-PBS), to detect HA-tagged ETMP1 and EHD1, respectively, and one of the  
515 following polyclonal rabbit antisera diluted 1:1000 in saponin-BSA-PBS unless otherwise  
516 stated: anti-adenosine-5'-phosphosulfate kinase (APSK; EHI\_179080; a mitochondrial  
517 matrix protein; (57) diluted 1:300; anti- vacuolar protein sorting 26 (Vps26; EHI\_062490;  
518 a retromer complex component (19)); anti-Rab11B (EHI\_107250; involved in cysteine  
519 protease secretion; (22)); and anti-pyridine nucleotide transhydrogenase (PNT;  
520 EHI\_014030; a novel class of lysosomal PNT; (21)). Secondary antibodies used were  
521 Alexa Fluor-488 anti-mouse antibody and Alexa Fluor-568 anti-rabbit antibody Thermo  
522 Fisher diluted 1:1000 in saponin-BSA-PBS, respectively. Cells were visualized using  
523 LSM780 (Carl Zeiss Microscopy, Germany) confocal laser scanning microscope.

### 524 **Subcellular fractionation and immunoblot analysis**

525 Trophozoites at the late-logarithmic phase were collected and washed thrice with  
526 2% glucose-PBS. Cells were mechanically disrupted using a Dounce homogenizer as  
527 described previously (13). The resulting homogenate was separated by Percoll-gradient

528 fractionation as previously described (13, 18). For carbonate fractionation, organelle-  
529 enriched fractions from HA-ETMP1, MBOMP30-HA, HA-EHD1 and mock control  
530 homogenates were collected by centrifugation at 100,000 *g* for 60 min at 4°C. The  
531 resultant pellet was reacted with sodium carbonate as previously described (13, 23, 24).  
532 All fractions collected were run in SDS-PAGE followed by Western blotting as previously  
533 described (60). Immunostaining of PVDF membranes was performed using anti-HA  
534 antibody, anti-APSK antiserum (organelle fraction marker), anti-cysteine synthase 1  
535 (CS1; EHI\_171750; cytosolic enzyme involved in cysteine metabolism) (61), anti-cysteine  
536 protease binding family protein 1 (CPBF1; EHI\_164800, membrane fraction control) (62)  
537 and chemiluminescent bands were visualized using LAS-4000 mini luminescent image  
538 analyzer (Fujifilm Life Science, Tokyo, Japan).

### 539 **In silico predictions and analyses**

540 Transmembrane domain-containing mitochondrial proteins were predicted using a  
541 pipeline developed in our previous study (12). To search for homologs of ETMP1 in  
542 various *Entamoeba* species, we used as query the *E. histolytica* protein, EHI\_175060,  
543 and implemented a BLAST search using the *Amoebozoa* resource database, AmoebaDB  
544 (63). Coiled-coil regions were predicted using DeepCoil (64).

### 545 **Immunoelectron microscopy**

546 Samples were prepared as described previously (24). The specimens were  
547 double-stained with anti-HA mouse antibody, and anti-APSK rabbit antiserum (57).  
548 Processing and visualization were performed by Tokai Microscopy Inc. (Nagoya, Japan),  
549 using a transmission electron microscope (JEM-1400 Plus, JEOL Ltd., Japan) at an

550 acceleration voltage of 80 kV. Digital images with a resolution of 2048 × 2048 pixels were  
551 taken using a CCD camera (VELETA, Olympus Soft Imaging Solution GmbH, Germany).

### 552 **Immunoprecipitation (IP) of HA-ETMP1 by anti-HA antibody**

553         Organelle-enriched fractions from HA-ETMP1 and mock pEhEx-HA control  
554 homogenates were prepared and approximately 2 µg of proteins were solubilized in 2%  
555 digitonin in IP Buffer containing 50 mM BisTris-HCl, pH 7.2, 50 mM NaCl, 0.001 %  
556 Ponceau S, and 10 % w/v glycerol for 30 min on ice. The solubilized fraction was collected  
557 by centrifugation at 20,000 g for 30 min at 4 °C. Immunoprecipitation was performed as  
558 previously described (23). Bound proteins were eluted overnight using 60 µg HA peptide.  
559 Eluted fractions were loaded on SDS-PAGE gels, followed by immunoblotting using  
560 mouse anti-HA antibody. Silver staining was performed using the Silver Stain MS kit  
561 (Fujifilm Wako Pure Chemical Corporation, Osaka, Japan), according to the  
562 manufacturer's protocol. Protein sequencing by liquid chromatography-mass  
563 spectrometry analysis was conducted by the Biomolecular Analysis Facility Core,  
564 University of Virginia.

### 565 **Lipid overlay assay**

566         As described previously (20), the lysate of HA-EHD1 expressing strain was used  
567 to probe a P-6001 phospholipid membrane strip (Echelon Biosciences, Salt Lake City,  
568 Utah, USA). The lysate of HA-SNX1 which binds to PI3P (20) was used as a positive  
569 control. The strips were washed three times with 0.1% Tween 20 in PBS (PBS-T),  
570 followed by reaction with 1:1000 anti-HA mouse antibody in 3% BSA-PBS for 2 h at room  
571 temperature. The strips were washed and incubated with 1:6000 HRP-conjugated goat  
572 anti-mouse IgG (Thermo-Fisher Scientific, USA) in 3% BSA-PBS for 1 h at room

573 temperature. Finally, the strips were washed and reacted with the Immobilon ECL Ultra  
574 Western HRP Substrate (Millipore, USA) following manufacturer's instructions.

### 575 **Endocytosis assay**

576 Approximately  $1 \times 10^5$  GFP-EHD1 or mock-GFP expressing trophozoites in 1 mL  
577 BI-S-33 of strains respectively were placed on a 35 mm collagen-coated glass- bottom  
578 culture dish (MatTek Corporation, Ashland, MA) for 15 minutes to allow for cell attachment.  
579 The medium was removed and replaced with 1 mL of BI-S-33 supplemented with either  
580 2 mg/mL RITC-dextran (MW = 70 000; Sigma-Aldrich, USA) or 100  $\mu$ g/ml Alexa Fluor-  
581 568 transferrin (Thermo-Fisher Scientific, USA). Chase was performed for up to 30 min  
582 for live imaging. For IFA, fixation was conducted onto HA-EHD1 and mock-HA strains  
583 after 0, 30, 60, 120 min of addition of either RITC-dextran or Alexa Fluor 568-transferrin.  
584 Images were captured using a confocal laser scanning microscope LSM780 (Carl Zeiss  
585 Microscopy, Germany), as the cells were being incubated at 35 °C using a temperature-  
586 controlled stage plate (Carl Zeiss Microscopy, Germany).

### 587 **Phagocytosis assay**

588 A semi-confluent culture of Chinese hamster ovary (CHO) cells, grown in F12  
589 medium (Sigma-Aldrich, USA) was stained by addition of 40  $\mu$ M CellTracker Blue  
590 (Thermo-Fisher Scientific, USA) for 30 min at 37°C. The medium containing excess dye  
591 was removed and the cells were washed in 1X PBS followed by treatment with 0.1%  
592 trypsin for 5 min at 37°C. The detached cells were collected and washed with 1X PBS  
593 thrice by centrifugation at 3000 rpm for 3 minutes. Stained CHO cells were resuspended  
594 in BI-S-33 medium prior to addition to amoeba cells. Cells were co-incubated for 15, 30,  
595 and 60 min respectively, after which they were fixed for IFA analysis as mentioned above,

596 but using anti-GFP antibody (Sigma-Aldrich, USA) and anti-Vps26 antiserum respectively.  
597 A parallel setup was prepared for live imaging analysis.

### 598 **Expression and purification of recombinant His-EHD1**

599 *Escherichia coli* BL21 strain was transformed using the pCold-His-EHD1 plasmid  
600 described above, and the transformants were selected using LB agar containing 150  
601 µg/ml of ampicillin. Isolated colonies were cultured in LB medium with 150 µg/ml of  
602 ampicillin, incubated at 37 °C with shaking. A 1L culture was inoculated and incubated in  
603 a shaker at 37 °C until reaching optical density (OD) 600 of 0.7. The culture was flash  
604 cooled in an ice water bath for 30 minutes. Induction of protein expression was made by  
605 adding 0.5 mM isopropyl β-D-thiogalactopyranoside (IPTG) to the medium followed by  
606 incubation at 15 °C with shaking for 24 h. Cells were collected and protein expression  
607 was confirmed by loading the soluble and insoluble fractions in SDS-PAGE followed by  
608 Coomassie blue staining and anti-His immunoblot analysis respectively as described  
609 previously (65). His-EHD1 was purified by binding with Ni<sup>2+</sup>-NTA His-bind slurry (Qiagen,  
610 Germany) and eluting with imidazole as described previously (65). Purified His-EHD1 was  
611 stored at -80°C with 20% glycerol in small aliquots until use.

### 612 **Enzyme activity assay**

613 Varying amounts of purified His-EHD1 (0, 0.125, 0.25, 0.5, 1.0 µg) were  
614 resuspended in assay buffer (20 mM HEPES pH 7.5, 0.005 % Tween 20, 10 % glycerol,  
615 1 mM DTT, 20 mM NaCl, and 10 mM MgCl<sub>2</sub>) and loaded triplicate onto independent wells  
616 of a 96-well plate. Then, 2 µl of 100 mM ATP was used as substrate and distilled water  
617 was added to bring the volume of the mixture to 20 µl. Finally, 20 µl of 2X stock solution  
618 (66) containing 100 mM Tris-HCl (pH 7.5), 10 mM MgCl<sub>2</sub>, 0.02% Triton X-100, 0.01%

619 BSA, 2 mM glucose, 0.2 mM NADP, 2 u/mL ADP-hexokinase, 2 U/mL glucose-6-  
620 phosphate dehydrogenase, 2 U/mL diaphorase I, 0.1 mM resazurin in DMSO, and 20 mM  
621 N-ethylmaleimide in DMSO, was added and the plate was incubated at 37 °C for 30 min.  
622 For determining kinetic parameters, 0, 12.5, 25, 50, 75, 100, 125, 250, 500, 750, 1000,  
623 and 2500 μM ATP was used to react with 1.5 μg His-EHD1 for 30 min. The fluorescence  
624 was measured continuously at excitation and emission wavelengths of 540 nm and  
625 590nm, respectively using SpectraMax Paradigm Multi-Mode microplate reader  
626 (Molecular Devices, San Jose, CA, USA).

627 *Manuscript word count: 6,531 words*

628

## 629 **Acknowledgments**

630 This research is funded by Grants-in-Aid for Scientific Research (B) (JP18H02650 and  
631 JP21H02723 to T.N.), Grants-in-Aid for Young Scientists (JP20K16233 to H.J.S.) and  
632 Core-to-Core Program, (JPJSCCB20190010) from the Japan Society for the Promotion  
633 of Science, Grant for research on emerging and re-emerging infectious diseases from  
634 Japan Agency for Medical Research and Development (AMED, JP20fk0108138 to T.N.).  
635 The authors want to thank Mihoko Imada of The University of Tokyo for her technical  
636 support. The authors also want to thank Dr. Takashi Makiuchi of Tokai University School  
637 of Medicine, Japan, and Dr. Eri Hayakawa of Jichi Medical University, Japan for their  
638 valuable discussion.

639 **Conflict of interest:** The authors declare no conflict of interest.

640

## 641 **Figure Legends**



642 **Figure 1**

643 **Multiple sequence alignment of ETMP1 orthologs in *Entamoeba*.** Amino acid  
644 sequences of orthologs in *E. histolytica* (EHI\_175060), *E. nuttalli* (ENU1\_040700), *E.*  
645 *dispar* (EDI\_139180), and *E. moshkovskii* (EMO\_001640) were aligned using MAFFT  
646 (67), and displayed using Jalview (68). The hydrophobic, positively charged, negatively  
647 charged, polar, cysteine, glycine, proline, aromatic residues are indicated in blue, red,  
648 magenta, green, pink, orange, yellow, and cyan respectively. Dashed black boxes show  
649 predicted coiled coil domains by DeepCoil (64), while the dashed red box indicates the  
650 predicted transmembrane region by our TMD prediction tool (12).

651 **Figure 2**

652 **Expression and localization of HA-ETMP1 in *E. histolytica* trophozoites.** (A)  
653 Approximately 30 µg protein from whole cell lysates of HA-ETMP1 and mock control  
654 (pEhEx-HA) strains were separated by SDS-PAGE and subjected to anti-HA immunoblot  
655 analysis. The 33 kDa band corresponds to the predicted molecular mass of HA-ETMP1  
656 (white arrowhead). (b) Immunofluorescence analysis of HA-ETMP1-expressing  
657 trophozoites, double stained with anti-HA (green) and anti-APSK (red) respectively. Scale  
658 bar = 10 µm. (C) Fractionation of HA-ETMP1 by discontinuous Percoll-gradient  
659 ultracentrifugation. Homogenate of HA-ETMP1 was separated by density against a  
660 Percoll gradient. Approximately 15 µL of fractions collected from the first (1 to 22) and  
661 second (A to V) ultracentrifugation steps were separated by SDS-PAGE followed by  
662 immunoblot analysis with anti-HA and anti-Cpn60 antibodies respectively. (D) Anti-HA  
663 and anti-Cpn60 immunoblot profiles of subcellular fractionation including alkaline  
664 carbonate treated organelle-rich fractions of HA-ETMP1 and HA-MBOMP30 (mitosome

665 membrane control) respectively. (E) Representative immunoelectron micrographs of 15  
666 nm anti-APSK gold-labeled mitosomes of HA-ETMP1, co-stained with 5 nm anti-HA gold.  
667 Scale bar = 200 nm.

### 668 **Figure 3**

669 **Growth curve of HA-ETMP1 and mock-HA strain.** Cell numbers of ETMP1 (black line)  
670 and mock-HA strain (red line) cultivated in BI-S-33 medium containing 0, 10, and 20  
671  $\mu\text{g/mL}$  G418 respectively, were plotted against time (h). Western blot analysis of whole  
672 cell lysates of HA-ETMP1 and mock-HA grown in medium containing 0, 10, and 20  $\mu\text{g/mL}$   
673 G418, and harvested at various time points. Upper and lower panels show anti-HA and  
674 anti-CPBF1 (loading control) immunoblots respectively.

### 675 **Figure 4**

676 **Anti-HA beads immunoprecipitation (IP) of mock-HA and HA-ETMP1 strains.** (A)  
677 Western blot analysis using anti-HA antibody of the cell lysates and various IP fractions  
678 of HA- mock-HA (left) and ETMP1 (right) respectively. A black arrowhead indicates the  
679 position of HA-tagged ETMP1 (33 kDa). (B) Silver stained-SDS-PAGE gel of IP eluates  
680 of mock-HA and HA-ETMP1 strains respectively. A black arrowhead points to a specific  
681  $\sim 55$  kDa band unique to HA-ETMP1. (C) Enriched or exclusively detected proteins in the  
682  $\sim 55$  kDa excised gel band from HA-ETMP1 IP eluate as compared to that of mock-HA  
683 control IP eluate by LC-MS/MS sequencing analysis. MW stands for predicted molecular  
684 weight. QV denotes quantitative values (normalized total spectra). Presence of the  
685 detected proteins in the previously published mitosome proteome data (Mi-ichi et al.,  
686 2009) was performed and the result listed in the last column (+ indicates presence, -  
687 indicates absence). (D) Total cell lysates of mock-HA and ETMP1 respectively were

688 separated by BN-PAGE, followed by anti-HA Western blot analysis. Black and red  
689 arrowheads respectively indicate the ~180 kDa and ~90 kDa complexes that contain HA-  
690 ETMP1.

## 691 **Figure 5**

692 **HA-EHD1 expression in *E. histolytica* trophozoites.** (A) Anti-HA immunoblot analysis  
693 of approximately 30 µg total cell lysates of mock-HA and HA-EHD1, respectively, show a  
694 61 kDa band corresponding to HA-tagged EHD1. (B-C) Representative  
695 immunofluorescence images of fixed HA-EHD1 expressing cells double-stained with anti-  
696 HA (green) and anti-APSK (red) antibodies respectively. White arrow and arrowheads  
697 indicate proximity and colocalization between anti-HA and anti-APSK signals respectively.  
698 Scale bar = 10 µm. (D) Representative immunoelectron micrographs of HA-EHD1  
699 trophozoites, double stained with 5 nm anti-HA gold and 15 nm anti-APSK gold. Scale  
700 bar = 200 nm. The letters “c”, “e”, and “m” indicate cytosol, endosomes, and mitosomes,  
701 respectively. An arrowhead points to the structure where the membranes of the mitosome  
702 and endosome are in close contact. (E) Percoll-gradient fractionation of HA-EHD1  
703 followed by western blot analysis using anti-HA and anti-Cpn60 antibodies respectively.

## 704 **Figure 6**

705 **Association of HA-EHD1 to *E. histolytica* membranes.** (A) Colocalization analysis of  
706 HA-EHD1 with various endosomal markers. Representative IFA images HA-EHD1 co-  
707 stained with anti-HA (green) and anti-vacuolar protein sorting 26 (Vps26, red, upper  
708 panel), anti-pyridine nucleotide transhydrogenase (PNT, red, middle panel), and anti-  
709 Rab11B (red, bottom panel) respectively. (B) Immunoblot analysis of carbonate  
710 fractionation assay of HA-EHD1 organelle-rich fraction using (from top to bottom panel)

711 anti-HA, anti-CS1 (cytosolic protein control) anti-Sec13 (peripheral membrane protein  
712 control), and anti-CPBF1 (membrane protein control) respectively. (C) Lipid overlay assay  
713 of HA-EHD1 and HA-SNX1 (PI3P binding protein control) respectively. The membrane  
714 strips contain 100 pmol of the following lipids per spot: lysophosphatidic acid (LPA),  
715 lysophosphocholine (LPC), phosphatidylinositol (PtdIns), phosphatidylinositol (3)-  
716 phosphate (PtdIns(3)P), phosphatidylinositol (4)-phosphate (PtdIns(4)P),  
717 phosphatidylinositol (5)-phosphate (PtdIns(5)P), phosphatidylethanolamine (PE)  
718 phosphatidylcholine (PC), sphingosine 1-phosphate (S1P), phosphatidylinositol (3,4)-  
719 bisphosphate (PtdIns(3,4)P<sub>2</sub>), phosphatidylinositol (3,5)-bisphosphate (PtdIns(3,5)P<sub>2</sub>),  
720 phosphatidylinositol (4,5)-bisphosphate (PtdIns(4,5)P<sub>2</sub>), phosphatidylinositol (3,4,5)-  
721 trisphosphate (PtdIns(3,4,5)P<sub>3</sub>), phosphatidic acid (PA), phosphatidylserine (PS)  
722 respectively.

### 723 **Figure 7**

724 **Involvement of HA-EHD1 in multivesicular body formation.** (A) Representative anti-  
725 HA antibody and anti-APSK antiserum (upper panel) or anti-Vps26 antiserum (lower  
726 panel) double-staining IFA images of trophozoites that expressed HA-EHD1 trophozoites  
727 after 1h, 3h, and 24h of induction by tetracycline. Scale bar = 10  $\mu$ m. (B) Representative  
728 immunoelectron image of trophozoite expressing HA-EHD1 24 h post-tetracycline  
729 induction, stained with 15 nm gold anti-HA. The initials “c”, “MVB”, and “ILV” denote  
730 cytosol, multivesicular body and intraluminal vesicle, respectively. Scale bar = 200 nm.

### 731 **Figure 8**

732 **Involvement of GFP-EHD1 in amoebic endocytosis.** (A) Anti-GFP immunoblot analysis  
733 of approximately 20  $\mu$ g total lysate of GFP-EHD1 expressing trophozoite. (B) Confocal

734 microscopy images from movies of live trophozoites expressing GFP-EHD1 (left panel),  
735 and GFP-EHD1 in medium supplemented with either RITC-dextran (middle panel) or  
736 Alexa Fluor 568-transferrin (right panel) respectively. Scale bar = 10  $\mu$ m.

737 **Figure 9**

738 **Involvement of HA-EHD1 in amoebic phagocytosis and trogocytosis.**

739 Representative IFA images of fixed anti-HA (green) and anti-Vps26 (red) double-stained  
740 HA-EHD1 trophozoites 15, 30, and 60 minutes (top to bottom) after coincubation with  
741 CellTracker Blue-stained Chinese hamster ovary (CHO) cells.

742 **Figure 10**

743 **Activity assay of purified recombinant His-EHD1.** (A) Coomassie Brilliant Blue-stained  
744 SDS-PAGE gel (left panel) and anti-His immunoblot (right panel) of purification fractions  
745 of His-EHD1. (C) Determination of the specific activity of His-EHD1 using ATP as  
746 substrate at various concentrations.

747

748 **Supplemental Materials**

749 **Supplementary Movie S1**

750 Multiple z-section images of fixed HA-EHD1, 24 h after tetracycline induction. Green and  
751 red signals indicate anti-HA and anti-APSK antibodies respectively. Scale bar = 5  $\mu$ m.

752 **Supplementary Movie S2**

753 Live imaging of GFP-EHD1 after 24 of tetracycline induction. Scale bar = 5  $\mu$ m.

754 **Supplementary Movie S3**

755 Live imaging of GFP-EHD1 trophozoites chased a few minutes after addition of RITC-  
756 dextran. Note the recruitment of GFP-EHD1 in newly closed endosomes. Scale bar = 5  
757  $\mu\text{m}$ .

758 **Supplementary Movie S4**

759 Live imaging of GFP-EHD1 trophozoites chased a few minutes after addition of Alexa  
760 Fluor 568-transferrin. Note the recruitment of GFP-EHD1 in newly closed endosomes.

761 **Supplementary Movie S5**

762 Live imaging of GFP-EHD1 trophozoites chased a few minutes after addition of Alexa  
763 Fluor 568-transferrin. Note the accumulation of GFP-EHD1 in the plasma membrane  
764 where aggregated transferrin is located. Scale bar = 5  $\mu\text{m}$ .

765 **Supplementary Movie S6**

766 Multiple z-section images of fixed GFP-EHD1, (60 min after co-incubation with  
767 CellTracker blue-stained Chinese hamster ovary cells. Scale bar = 5  $\mu\text{m}$ .

768 **Supplementary Movie S7**

769 Live imaging of GFP-EHD1 trophozoites chased a few minutes after co-incubation with  
770 CellTracker blue-stained Chinese hamster ovary cells. Scale bar = 5  $\mu\text{m}$ .

771 **Supplementary Figure S1**

772 **Anti-HA immunoprecipitation of HA-EHD1 and mock-HA control.** (A) Western blot  
773 analysis of various IP fractions probed using anti-HA antibody (B) Silver-stained SDS-  
774 PAGE gel showing separated protein bands from eluted IP samples. Black boxes  
775 indicated regions excised and submitted for subsequent protein sequencing analysis.

776 **Supplementary Table S1**

777 (A) Exclusively detected proteins in the ~180 kDa excised blue-native PAGE gel band  
778 from HA-ETMP1 as compared to that of mock-HA control by LC-MS/MS sequencing  
779 analysis. MW indicates predicted molecular weight, while QV denotes quantitative values  
780 (normalized total spectra). (B) Detected proteins in the ~180 kDa excised blue-native  
781 PAGE gel band enriched in HA-ETMP1 as compared to that of mock-HA control by LC-  
782 MS/MS sequencing analysis (Qv HA/ETMp1/mock-HA  $\geq$  2.0.) (C) Exclusively detected  
783 proteins in the ~90 kDa excised blue-native PAGE gel band enriched in HA-ETMP1 as  
784 compared to that of mock-HA control by LC-MS/MS sequencing analysis.

### 785 **Supplementary Table S2**

786 (A) Proteins identified in the 55-58 kDa excised gel band of HA-EHD1 and mock-HA IP  
787 eluate samples respectively, by LC-MS/MS analysis. MW indicates predicted molecular  
788 weight, while QV denotes quantitative values (normalized total spectra). (B) Proteins  
789 identified in the 30-33 kDa excised gel band of HA-EHD1 and mock-HA IP respectively,  
790 by LC-MS/MS analysis. MW indicates predicted molecular weight, while QV denotes  
791 quantitative values (normalized total spectra).

792

793

### 794 **References**

- 795 1. Jain A, Holthuis JCM. 2017. Membrane contact sites, ancient and central hubs of  
796 cellular lipid logistics. *Biochim Biophys Acta - Mol Cell Res* 1864:1450–1458.
- 797 2. Helle SCJ, Kanfer G, Kolar K, Lang A, Michel AH, Kornmann B. 2013.  
798 Organization and function of membrane contact sites. *Biochim Biophys Acta - Mol*  
799 *Cell Res* 1833:2526–2541.

- 800 3. Scorrano L, De Matteis MA, Emr S, Giordano F, Hajnóczky G, Kornmann B,  
801 Lackner LL, Levine TP, Pellegrini L, Reinisch K, Rizzuto R, Simmen T, Stenmark  
802 H, Ungermann C, Schuldiner M. 2019. Coming together to define membrane  
803 contact sites. *Nat Commun* 10:1–11.
- 804 4. Hoyer MJ, Chitwood PJ, Ebmeier CC, Striepen JF, Qi RZ, Old WM, Voeltz GK.  
805 2018. A novel class of ER membrane proteins regulates ER-associated  
806 endosome fission. *Cell* 175:254–265.
- 807 5. Wong YC, Ysselstein D, Krainc D. 2018. Mitochondria-lysosome contacts regulate  
808 mitochondrial fission via RAB7 GTP hydrolysis. *Nature* 554:382–386.
- 809 6. Stanley SL. 2003. Amoebiasis. *Lancet* 361:1025–1034.
- 810 7. Santos HJ, Makiuchi T, Nozaki T. 2018. Reinventing an Organelle: The Reduced  
811 Mitochondrion in Parasitic Protists. *Trends Parasitol* 1–18.
- 812 8. Mi-ichi F, Miyamoto T, Takao S, Jeelani G, Hashimoto T, Hara H, Nozaki T,  
813 Yoshida H. 2015. *Entamoeba* mitosomes play an important role in encystation by  
814 association with cholesteryl sulfate synthesis. *Proc Natl Acad Sci* 112:E2884–  
815 E2890.
- 816 9. Teixeira JE, Huston CD. 2008. Evidence of a continuous endoplasmic reticulum in  
817 the protozoan parasite *Entamoeba histolytica* 7:1222–1226.
- 818 10. Perdomo D, Aït-Ammar N, Syan S, Sachse M, Jhingan GD, Guillén N. 2015.  
819 Cellular and proteomics analysis of the endomembrane system from the  
820 unicellular *Entamoeba histolytica*. *J Proteomics* 112:125–140.
- 821 11. Santos HJ, Imai K, Makiuchi T, Tomii K, Horton P, Nozawa A, Okada K, Tozawa  
822 Y, Nozaki T. 2019. Novel lineage-specific transmembrane  $\beta$ -barrel proteins in the



- 823 endoplasmic reticulum of *Entamoeba histolytica*. *FEBS J* 286:3416–3432.
- 824 12. Santos HJ, Imai K, Hanadate Y, Fukasawa Y, Oda T, Mi-ichi F, Nozaki T. 2016.  
825 Screening and discovery of lineage-specific mitosomal membrane proteins in  
826 *Entamoeba histolytica*. *Mol Biochem Parasitol* 209:10–17.
- 827 13. Santos HJ, Hanadate Y, Imai K, Nozaki T. 2019. An *Entamoeba*-Specific  
828 Mitosomal Membrane Protein with Potential Association to the Golgi Apparatus.  
829 *Genes (Basel)* 10:367.
- 830 14. Santos HJ, Nozaki T. 2021. Interorganellar communication and membrane  
831 contact sites in protozoan parasites. *Parasitol Int* 83:102372.
- 832 15. Saito-Nakano Y, Loftus BJ, Hall N, Nozaki T. 2005. The diversity of Rab GTPases  
833 in *Entamoeba histolytica*. *Exp Parasitol* 110:244–252.
- 834 16. Lopez-Reyes I, García-Rivera G, Bauelos C, Herranz S, Vincent O, Lopez-  
835 Camarillo C, Marchat LA, Orozco E. 2010. Detection of the endosomal sorting  
836 complex required for transport in *entamoeba histolytica* and characterization of  
837 the EhVps4 protein. *J Biomed Biotechnol* 2010.
- 838 17. Avalos-Padilla Y, Knorr RL, Javier-Reyna R, García-Rivera G, Lipowsky R,  
839 Dimova R, Orozco E. 2018. The Conserved ESCRT-III Machinery Participates in  
840 the Phagocytosis of *Entamoeba histolytica*. *Front Cell Infect Microbiol* 8:1–17.
- 841 18. Mi-ichi F, Yousuf MA, Nakada-Tsukui K, Nozaki T. 2009. Mitosomes in  
842 *Entamoeba histolytica* contain a sulfate activation pathway. *Proc Natl Acad Sci*  
843 106:21731–21736.
- 844 19. Nakada-Tsukui K, Saito-Nakano Y, Ali V, Nozaki T. 2005. A retromerlike complex  
845 is a novel Rab7 effector that is involved in the transport of the virulence factor

- 846 cysteine protease in the enteric protozoan parasite *Entamoeba histolytica*. *Mol*  
847 *Biol Cell* 2005/08/27. 16:5294–5303.
- 848 20. Watanabe N, Nakada-Tsukui K, Nozaki T. 2020. Two isoforms of  
849 phosphatidylinositol 3-phosphate-binding sorting nexins play distinct roles in  
850 trogocytosis in *Entamoeba histolytica*. *Cell Microbiol* 22:1–16.
- 851 21. Yousuf MA, Mi-Ichi F, Nakada-Tsukui K, Nozaki T. 2010. Localization and  
852 targeting of an unusual pyridine nucleotide transhydrogenase in *Entamoeba*  
853 *histolytica*. *Eukaryot Cell* 9:926–933.
- 854 22. Mitra BN, Saito-Nakano Y, Nakada-Tsukui K, Sato D, Nozaki T. 2007. Rab11B  
855 small GTPase regulates secretion of cysteine proteases in the enteric protozoan  
856 parasite *Entamoeba histolytica*. *Cell Microbiol* 9:2112–2125.
- 857 23. Makiuchi T, Mi-ichi F, Nakada-Tsukui K, Nozaki T. 2013. Novel TPR-containing  
858 subunit of TOM complex functions as cytosolic receptor for *Entamoeba* mitosomal  
859 transport. *Sci Rep* 3:1129.
- 860 24. Santos HJ, Imai K, Makiuchi T, Tomii K, Horton P, Nozawa A, Ibrahim M, Tozawa  
861 Y, Nozaki T. 2015. A novel mitosomal  $\beta$ -barrel outer membrane protein in  
862 *Entamoeba*. *Sci Rep* 5:1–10.
- 863 25. Galperin E, Benjamin S, Rapaport DD, Rotem-Yehudar R, Tolchinsky S, Horowitz  
864 M. 2002. EHD3: A protein that resides in recycling tubular and vesicular  
865 membrane structures and interacts with EHD1. *Traffic* 3:575–589.
- 866 26. George M, Ying GG, Rainey MA, Solomon A, Parikh PT, Gao Q, Band V, Band H.  
867 2007. Shared as well as distinct roles of EHD proteins revealed by biochemical  
868 and functional comparisons in mammalian cells and *C. elegans*. *BMC Cell Biol*

- 869 8:1–22.
- 870 27. Confalonieri S, Di Fiore PP. 2002. The Eps15 homology (EH) domain. *FEBS Lett*
- 871 513:24–29.
- 872 28. Yeow I, Howard G, Chadwick J, Mendoza-Topaz C, Hansen CG, Nichols BJ,
- 873 Shvets E. 2017. EHD Proteins Cooperate to Generate Caveolar Clusters and to
- 874 Maintain Caveolae during Repeated Mechanical Stress. *Curr Biol* 27:2951-
- 875 2962.e5.
- 876 29. Melo AA, Hegde BG, Shah C, Larsson E, Isas JM, Kunz S, Lundmark R, Langen
- 877 R, Daumke O. 2017. Structural insights into the activation mechanism of dynamin-
- 878 like EHD ATPases. *Proc Natl Acad Sci U S A* 114:5629–5634.
- 879 30. Naslavsky N, Rahajeng J, Rapaport D, Horowitz M, Caplan S. 2007. EHD1
- 880 regulates cholesterol homeostasis and lipid droplet storage. *Biochem Biophys*
- 881 *Res Commun* 357:792–799.
- 882 31. Bar M, Aharon M, Benjamin S, Rotblat B, Horowitz M, Avni A. 2008. AtEHDs,
- 883 novel Arabidopsis EH-domain-containing proteins involved in endocytosis. *Plant J*
- 884 55:1025–1038.
- 885 32. Lin SX, Grant B, Hirsh D, Maxfield FR. 2001. Rme-1 regulates the distribution and
- 886 function of the endocytic recycling compartment in mammalian cells. *Nat Cell Biol*
- 887 3:567–572.
- 888 33. Thakur V, Asad M, Jain S, Hossain ME, Gupta A, Kaur I, Rathore S, Ali S, Khan
- 889 NJ, Mohmmmed A. 2015. Eps15 homology domain containing protein of
- 890 *Plasmodium falciparum* (PfEHD) associates with endocytosis and vesicular
- 891 trafficking towards neutral lipid storage site. *Biochim Biophys Acta - Mol Cell Res*

- 892 1853:2856–2869.
- 893 34. Gueho A, Bosmani C, Gopaldass N, Molle V, Soldati T, Letourneur F. 2016.  
894 Dictyostelium EHD associates with Dynamin and participates in phagosome  
895 maturation. *J Cell Sci* 129:2354–2367.
- 896 35. Daumke O, Lundmark R, Vallis Y, Martens S, Butler PJG, McMahon HT. 2007.  
897 Architectural and mechanistic insights into an EHD ATPase involved in membrane  
898 remodelling. *Nature* 449:923–927.
- 899 36. Sharma M, Giridharan SSP, Rahajeng J, Naslavsky N, Aplan S. 2009. MICAL-L1  
900 Links EHD1 to Tubular Recycling Endosomes and Regulates Receptor Recycling.  
901 *Mol Biol Cell* 20:4524–4530.
- 902 37. Pant S, Sharma M, Patel K, Caplan S, Carr CM, Grant BD. 2009. AMPH-  
903 1/Amphiphysin/Bin1 functions with RME-1/Ehd1 in endocytic recycling. *Nat Cell*  
904 *Biol* 11:1399–1410.
- 905 38. Lee DW, Zhao X, Scarselletta S, Schweinsberg PJ, Eisenberg E, Grant BD,  
906 Greene LE. 2005. ATP binding regulates oligomerization and endosome  
907 association of RME-1 family proteins. *J Biol Chem* 280:17213–17220.
- 908 39. Stoeber M, Stoeck IK, HéCurrency Signnni C, Bleck CKE, Balistreri G, Helenius  
909 A. 2012. Oligomers of the ATPase EHD2 confine caveolae to the plasma  
910 membrane through association with actin. *EMBO J* 31:2350–2364.
- 911 40. Deo R, Kushwah MS, Kamerkar SC, Kadam NY, Dar S, Babu K, Srivastava A,  
912 Pucadyil TJ. 2018. ATP-dependent membrane remodeling links EHD1 functions  
913 to endocytic recycling. *Nat Commun* 9.
- 914 41. Nakada-Tsukui K, Watanabe N, Maehama T, Nozaki T. 2019.

- 915            Phosphatidylinositol Kinases and Phosphatases in *Entamoeba histolytica*. *Front*  
916            *Cell Infect Microbiol* 9:1–36.
- 917    42.    Koushik AB, Powell RR, Temesvari LA. 2013. Localization of phosphatidylinositol  
918            4,5-bisphosphate to lipid rafts and uroids in the human protozoan parasite  
919            *entamoeba histolytica*. *Infect Immun* 81:2145–2155.
- 920    43.    Swanson JA. 2014. Phosphoinositides and engulfment. *Cell Microbiol* 16:1473–  
921            1483.
- 922    44.    Wallroth A, Haucke V. 2018. Phosphoinositide conversion in endocytosis and the  
923            endolysosomal system. *J Biol Chem* 293:1526–1535.
- 924    45.    Odorizzi G, Babst M, Emr SD. 1998. Fab1p PtdIns(3)P 5-kinase function essential  
925            for protein sorting in the multivesicular body. *Cell* 95:847–858.
- 926    46.    Das K, Watanabe N, Nozaki T. 2021. Two StAR-related lipid transfer proteins play  
927            specific roles in endocytosis, exocytosis, and motility in the parasitic protist  
928            *Entamoeba histolytica*. *PLoS Pathog* 17:1–27.
- 929    47.    Das A, Nag S, Mason AB, Barroso MM. 2016. Endosome-mitochondria  
930            interactions are modulated by iron release from transferrin. *J Cell Biol* 214:831–  
931            845.
- 932    48.    Farmer T, Reinecke JB, Xie S, Bahl K, Naslavsky N, Caplan S. 2017. Control of  
933            mitochondrial homeostasis by endocytic regulatory proteins. *J Cell Sci* 130:2359–  
934            2370.
- 935    49.    Wexler-Cohen Y, Stevens GC, Barnoy E, Van Der Blik AM, Johnson PJ. 2014. A  
936            dynamin-related protein contributes to *Trichomonas vaginalis* hydrogenosomal  
937            fission. *FASEB J* 28:1113–1121.

- 938 50. Makiuchi T, Santos HJ, Tachibana H, Nozaki T. 2017. Hetero-oligomer of  
939 dynamin-related proteins participates in the fission of highly divergent  
940 mitochondria from *Entamoeba histolytica*. *Sci Rep* 7:1–13.
- 941 51. Santos HJ, Makiuchi T, Nozaki T. 2018. Reinventing an Organelle: The Reduced  
942 Mitochondrion in Parasitic Protists. *Trends Parasitol* 34:1038–1055.
- 943 52. Soubannier V, McLelland GL, Zunino R, Braschi E, Rippstein P, Fon EA, McBride  
944 HM. 2012. A vesicular transport pathway shuttles cargo from mitochondria to  
945 lysosomes. *Curr Biol* 22:135–141.
- 946 53. Li Z, Schulze RJ, Weller SG, Krueger EW, Schott MB, Zhang X, Casey CA, Liu J,  
947 Stöckli J, James DE, McNiven MA. 2016. A novel rab10-EHBP1-EHD2 complex  
948 essential for the autophagic engulfment of lipid droplets. *Sci Adv* 2.
- 949 54. Diamond LS, Harlow DR, Cunnick CC. 1978. A new medium for the axenic  
950 cultivation of *Entamoeba histolytica* and other *Entamoeba*. *Trans R Soc Trop Med*  
951 *Hyg*1978/01/01. 72:431–432.
- 952 55. Bracha R, Nuchamowitz Y, Anbar M, Mirelman D. 2006. Transcriptional silencing  
953 of multiple genes in trophozoites of *Entamoeba histolytica*. *PLoS*  
954 *Pathog*2006/05/31. 2:e48.
- 955 56. Nakada-Tsukui K, Okada H, Mitra BN, Nozaki T. 2009. Phosphatidylinositol-  
956 phosphates mediate cytoskeletal reorganization during phagocytosis via a unique  
957 modular protein consisting of RhoGEF/DH and FYVE domains in the parasitic  
958 protozoon *Entamoeba histolytica*. *Cell Microbiol* 11:1471–1491.
- 959 57. Mi-ichi F, Makiuchi T, Furukawa A, Sato D, Nozaki T. 2011. Sulfate activation in  
960 mitosomes plays an important role in the proliferation of *Entamoeba histolytica*.

- 961 PLoS Negl Trop Dis 5:e1263.
- 962 58. Nozaki T, Asai T, Sanchez LB, Kobayashi S, Nakazawa M, Takeuchi T. 1999.  
963 Characterization of the Gene Encoding Serine Acetyltransferase , a Regulated  
964 Enzyme of Cysteine Biosynthesis from the Protist Parasites *Entamoeba*  
965 *histolytica* and *Entamoeba dispar* 274:32445–32452.
- 966 59. Chiba Y, Kamikawa R, Nakada-Tsukui K, Saito-Nakano Y, Nozaki T. 2015.  
967 Discovery of PPI-type Phosphoenolpyruvate Carboxykinase Genes in Eukaryotes  
968 and Bacteria. *J Biochem* 290:23960–23970.
- 969 60. Tomii K, Santos HJ, Nozaki T. 2019. Genome-wide analysis of known and  
970 potential tetraspanins in *Entamoeba histolytica*. *Genes (Basel)* 10:1–19.
- 971 61. Nozaki T, Asai T, Kobayashi S, Ikegami F, Noji M, Saito K, Takeuchi T. 1998.  
972 Molecular cloning and characterization of the genes encoding two isoforms of  
973 cysteine synthase in the enteric protozoan parasite *Entamoeba histolytica*. *Mol*  
974 *Biochem Parasitol* 97:33–44.
- 975 62. Nakada-Tsukui K, Tsuboi K, Furukawa A, Yamada Y, Nozaki T. 2012. A novel  
976 class of cysteine protease receptors that mediate lysosomal transport. *Cell*  
977 *Microbiol* 14:1299–1317.
- 978 63. Aurrecochea C, Barreto A, Brestelli J, Brunk BP, Caler E V., Fischer S, Gajria B,  
979 Gao X, Gingle A, Grant G, Harb OS, Heiges M, Iodice J, Kissinger JC, Kraemer  
980 ET, Li W, Nayak V, Pennington C, Pinney DF, Pitts B, Roos DS, Srinivasamoorthy  
981 G, Stoeckert CJ, Treatman C, Wang H. 2011. AmoebaDB and MicrosporidiaDB:  
982 Functional genomic resources for Amoebozoa and Microsporidia species. *Nucleic*  
983 *Acids Res* 39:1–8.

- 984 64. Ludwiczak J, Winski A, Szczepaniak K, Alva V, Dunin-Horkawicz S. 2019.  
985 DeepCoil - A fast and accurate prediction of coiled-coil domains in protein  
986 sequences. *Bioinformatics* 35:2790–2795.
- 987 65. Nurkanto A, Jeelani G, Santos HJ, Rahmawati Y, Mori M, Nakamura Y, Goto K,  
988 Saikawa Y, Annoura T, Tozawa Y, Sakura T, Inaoka DK, Shiomi K, Nozaki T.  
989 2021. Characterization of *Plasmodium falciparum* Pantothenate Kinase and  
990 Identification of Its Inhibitors From Natural Products. *Front Cell Infect Microbiol*  
991 11:1–10.
- 992 66. Kumagai K, Kojima H, Okabe T, Nagano T. 2014. Development of a highly  
993 sensitive, high-throughput assay for glycosyltransferases using enzyme-coupled  
994 fluorescence detection. *Anal Biochem* 447:146–155.
- 995 67. Katoh K, Standley DM. 2013. MAFFT multiple sequence alignment software  
996 version 7: Improvements in performance and usability. *Mol Biol Evol* 30:772–780.
- 997 68. Waterhouse AM, Procter JB, Martin DMA, Clamp M, Barton GJ. 2009. Jalview  
998 Version 2-a multiple sequence alignment editor and analysis workbench.  
999 *Bioinformatics* 25:1189–1191.
- 1000



# Figure 1

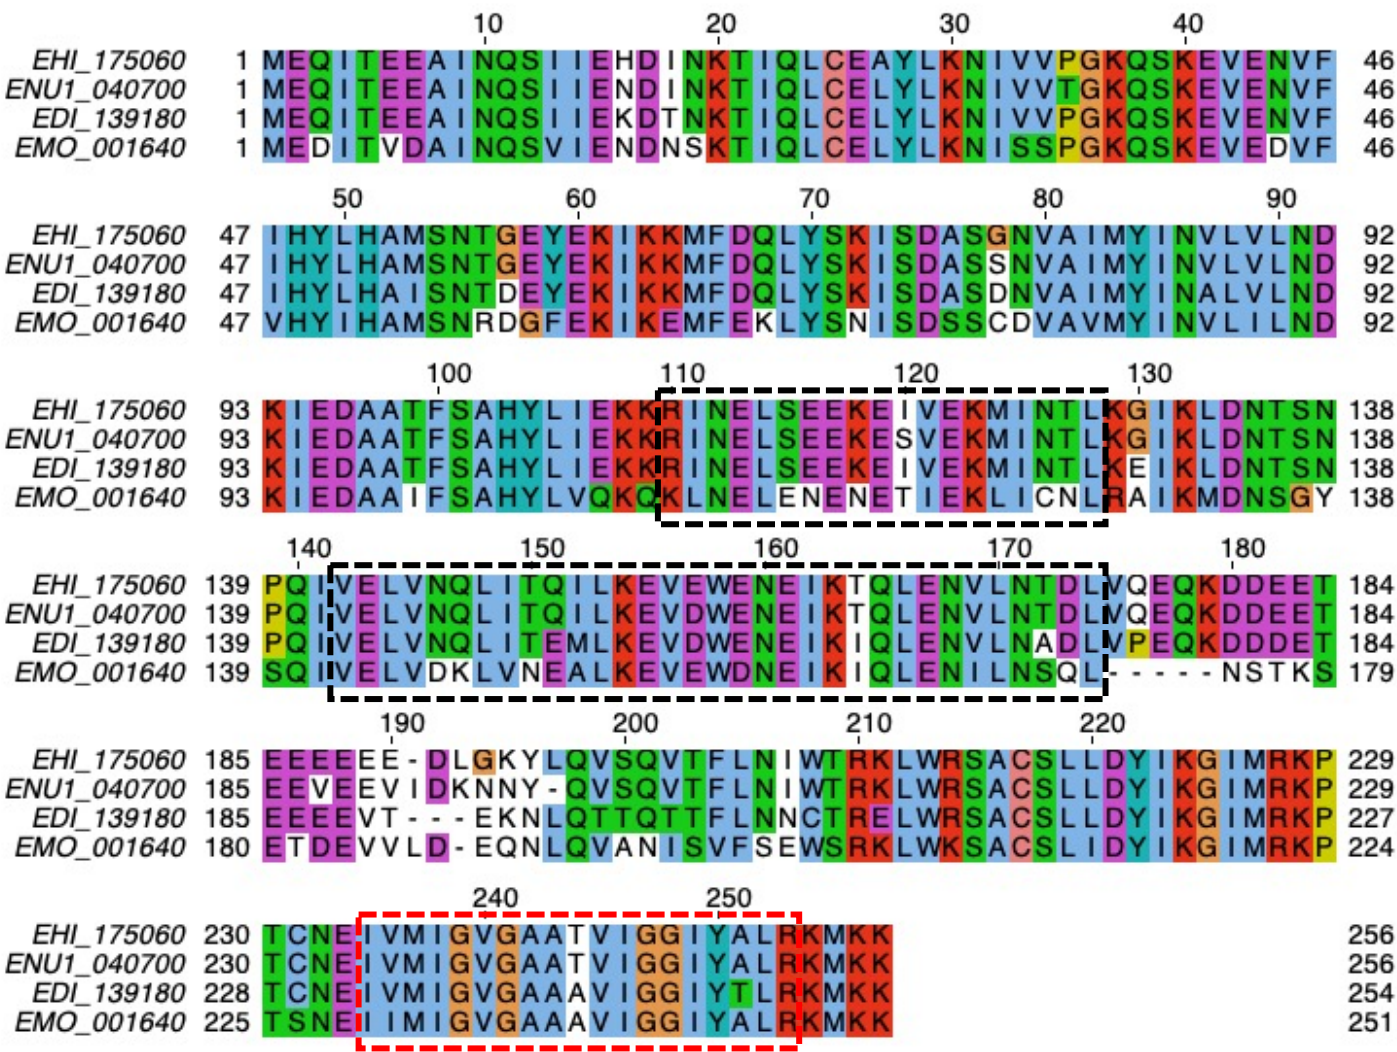

# Figure 2

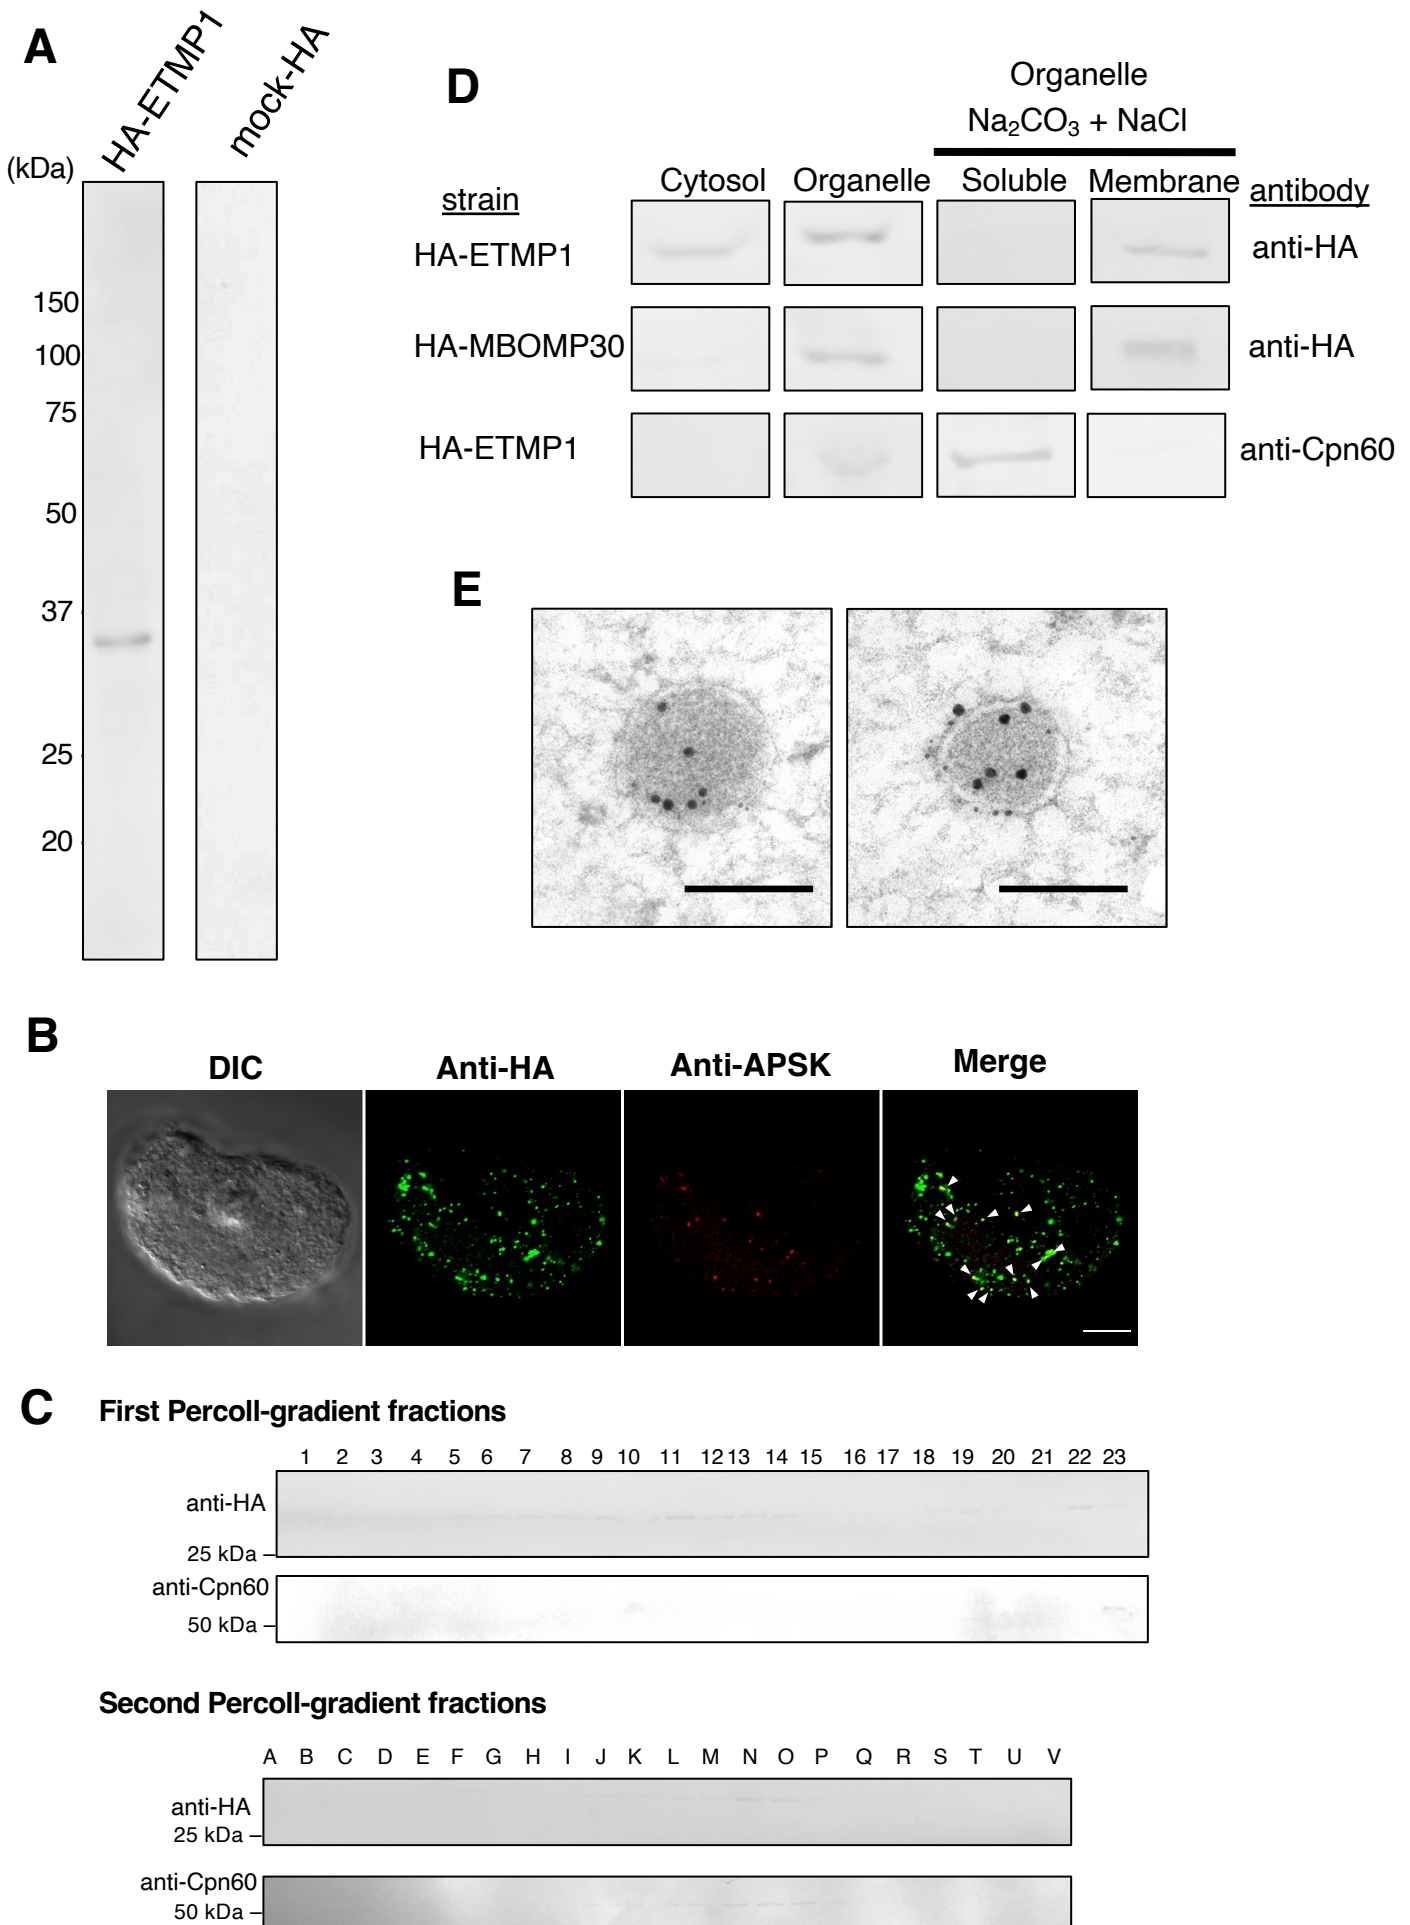

# Figure 3

## A

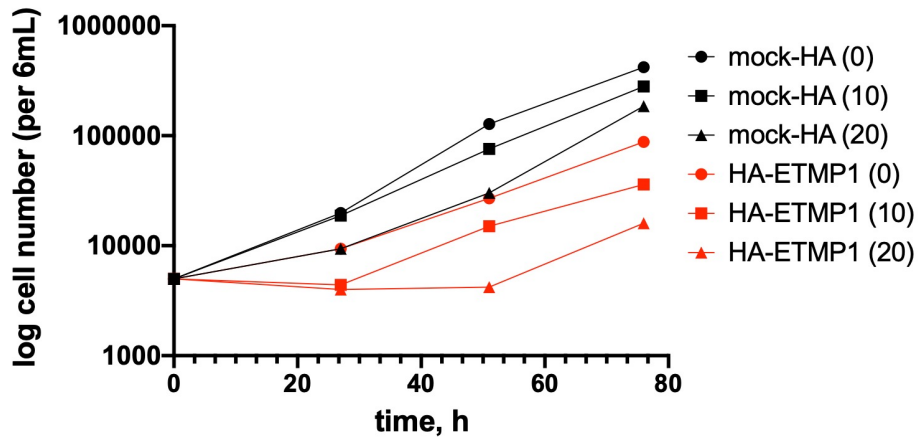

## B

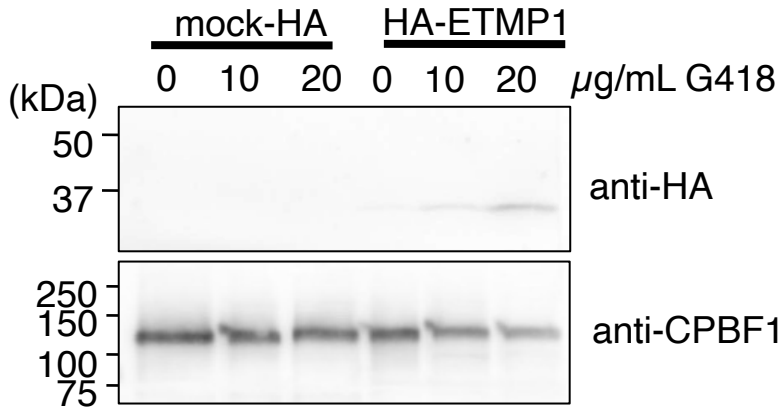

**Figure 4**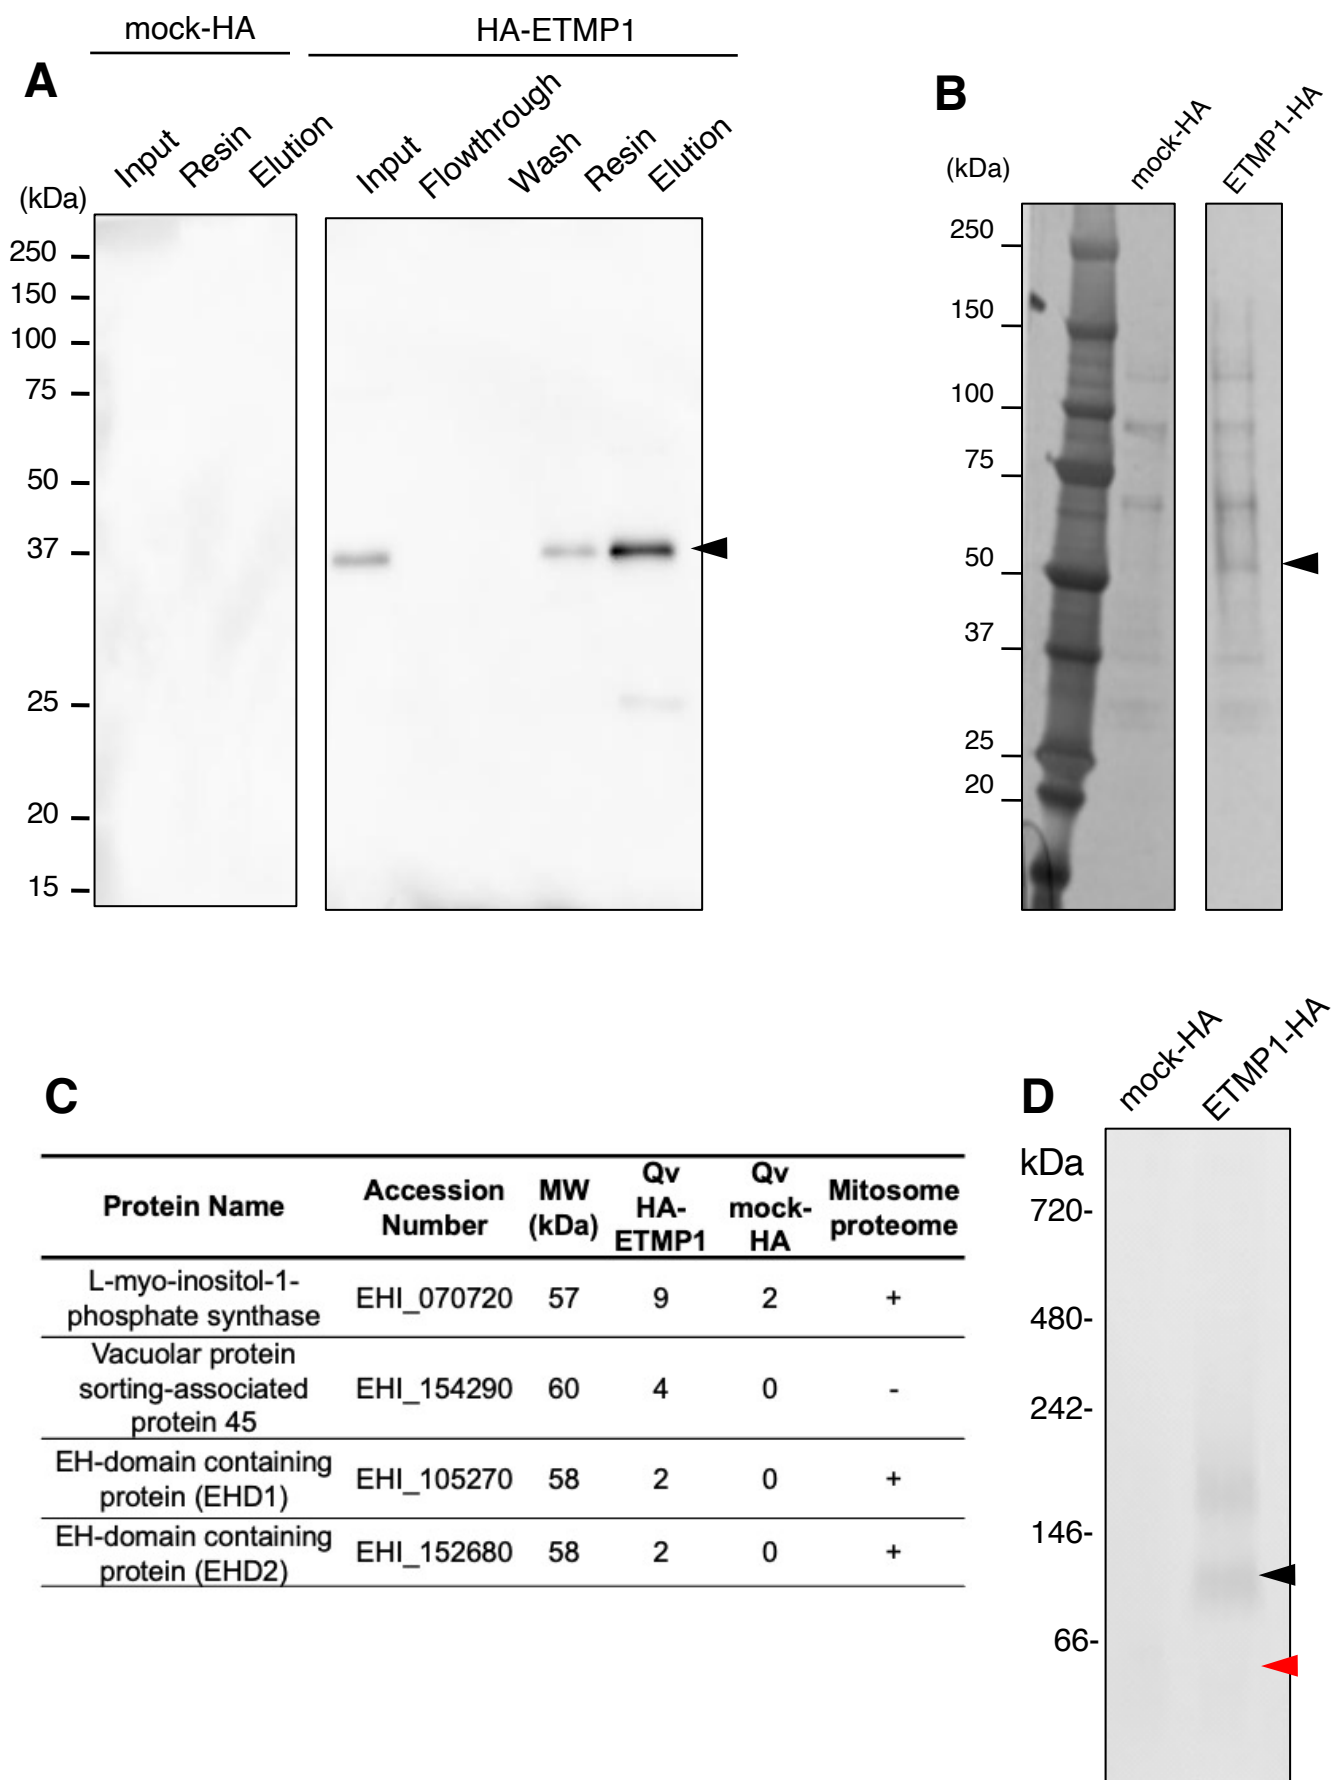

# Figure 5

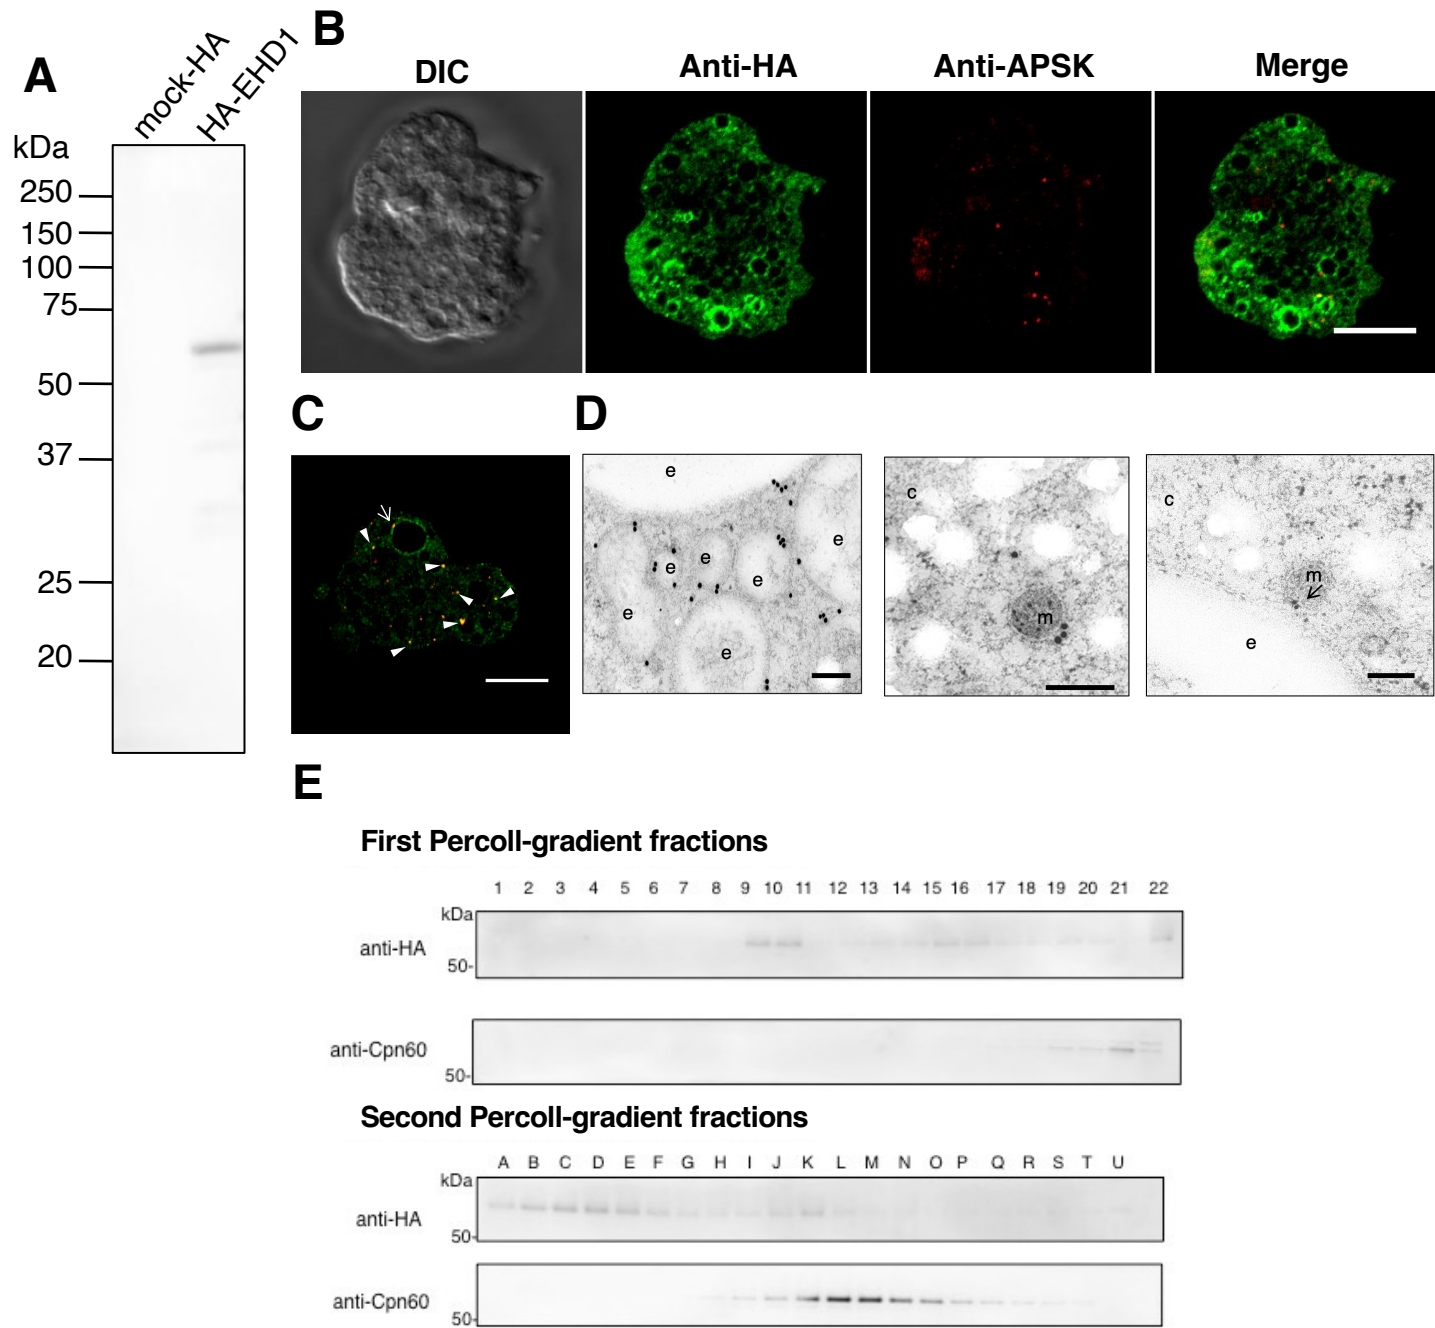



**Figure 6****A**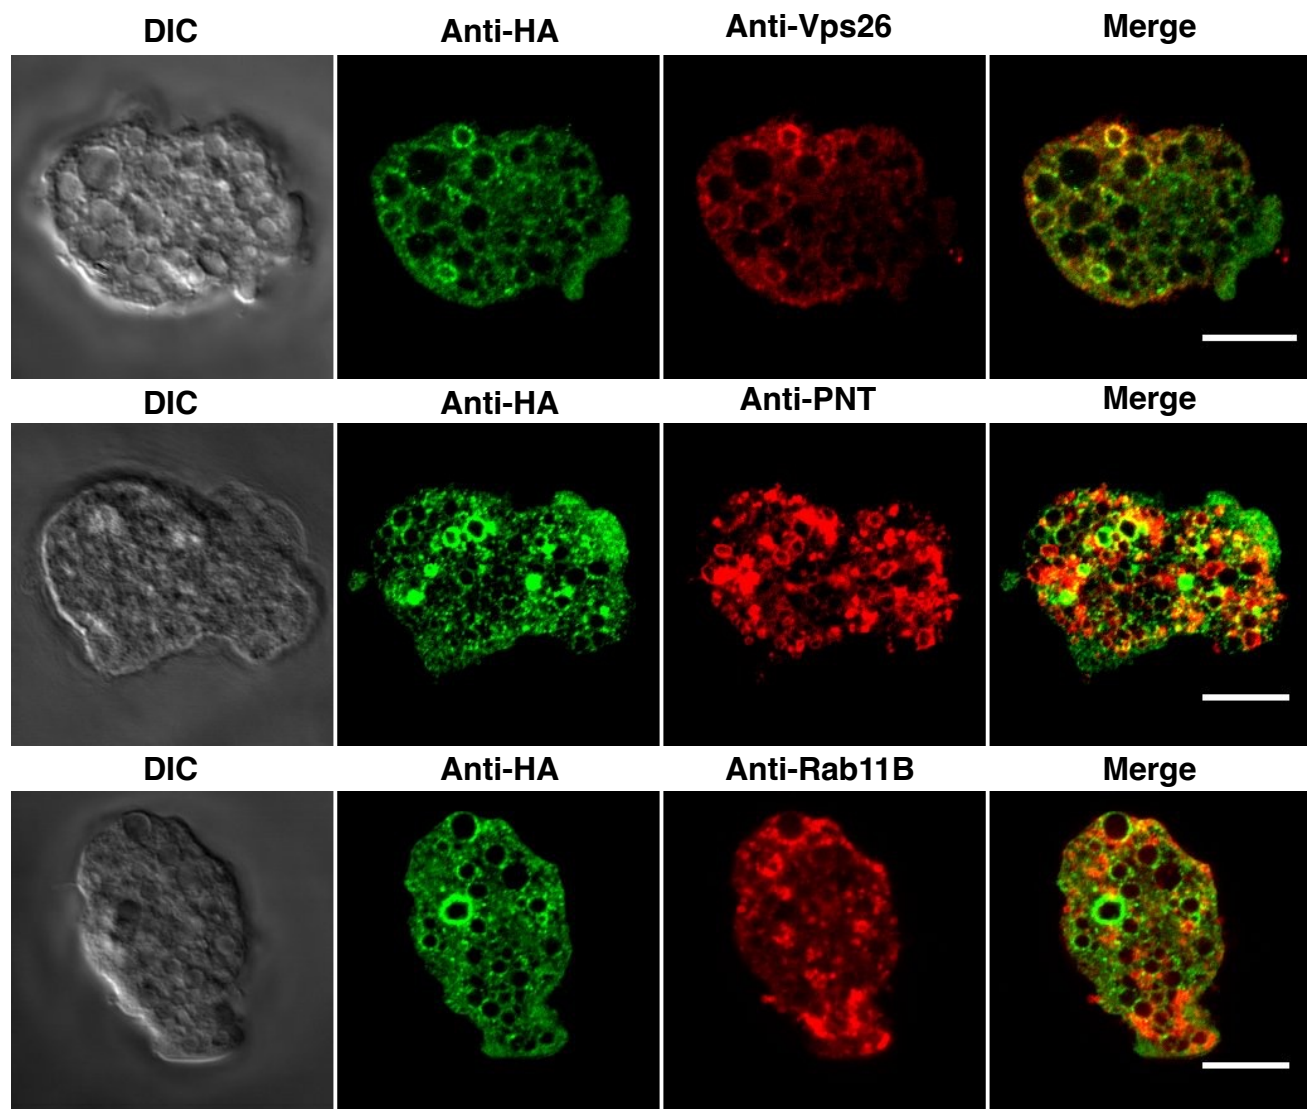**B**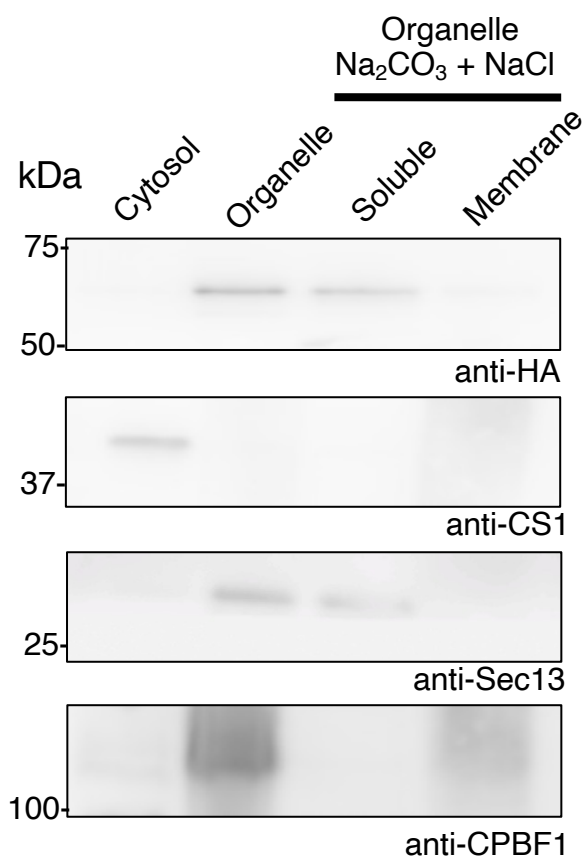**C**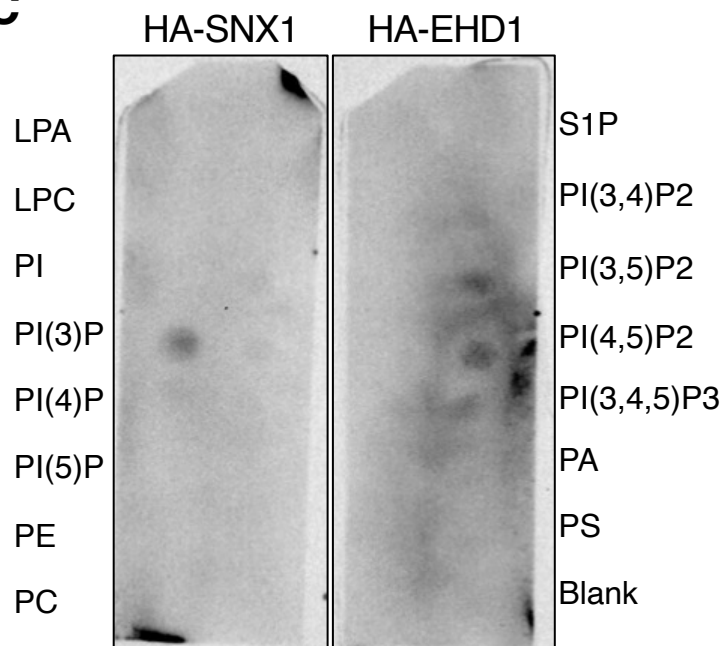

**Figure 7**

**A**

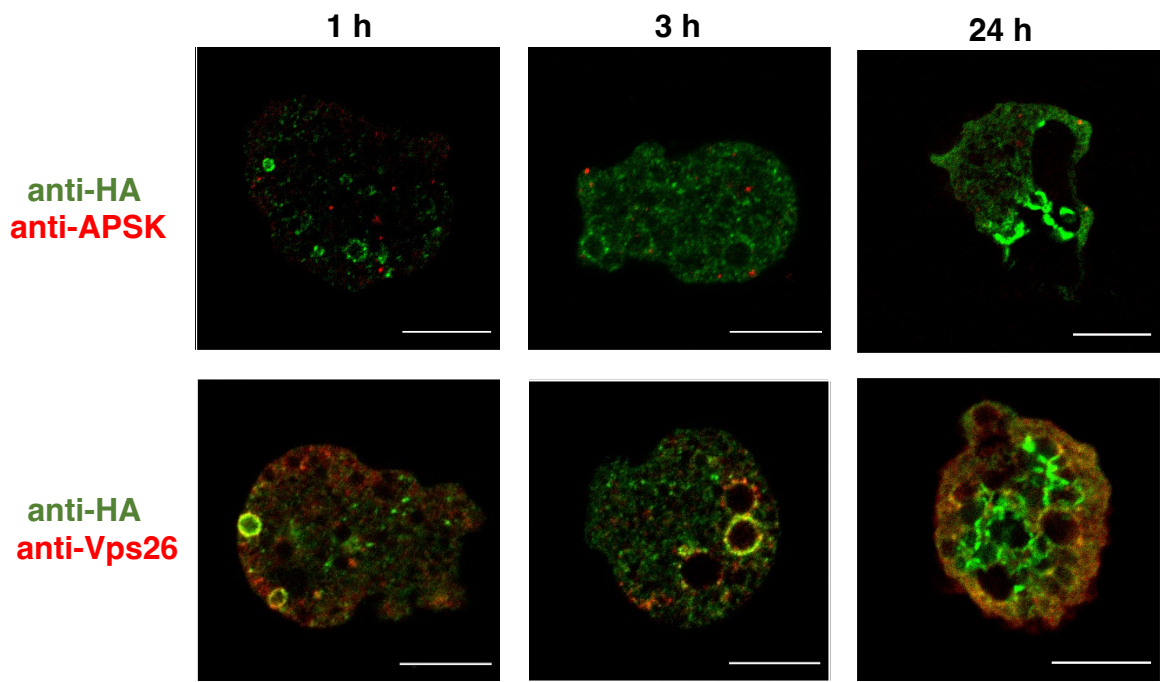

**B**

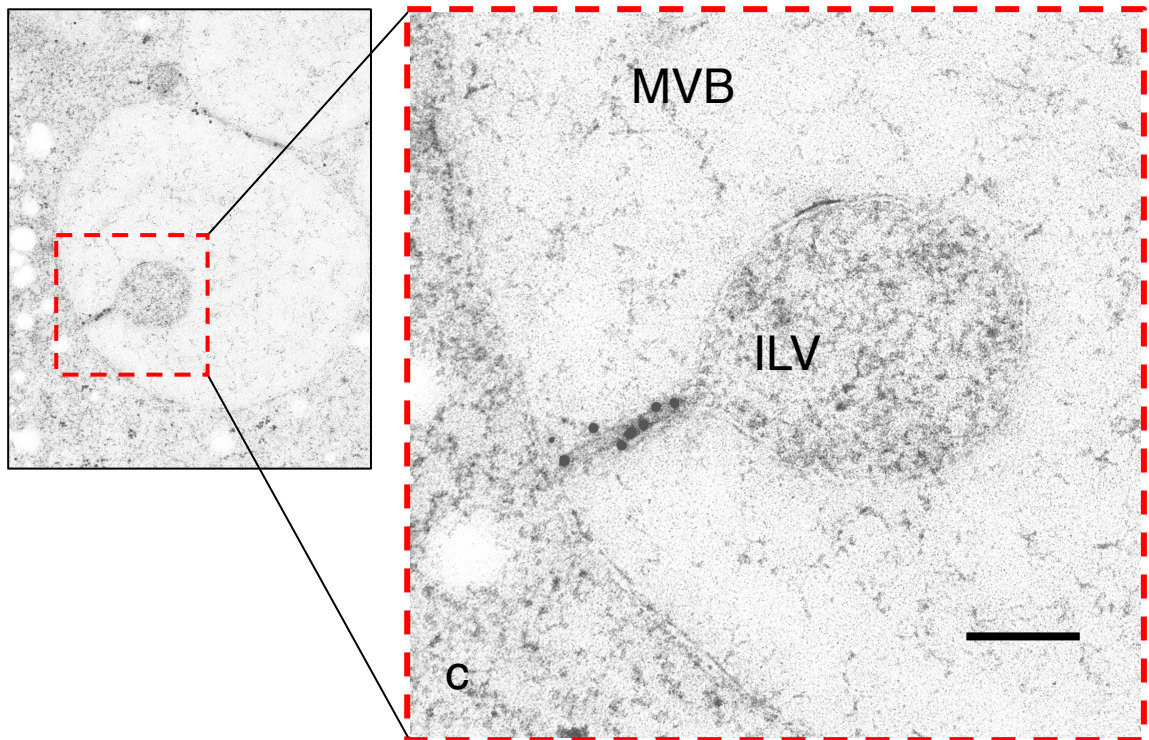

**Figure 8**

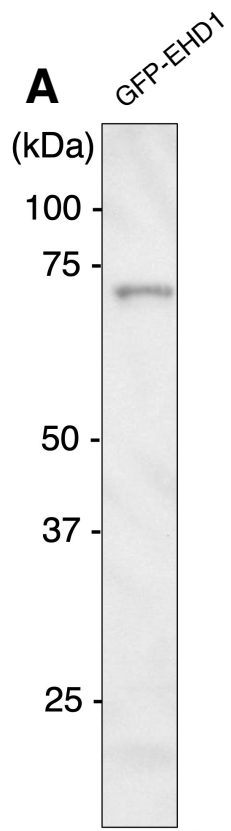

**B**

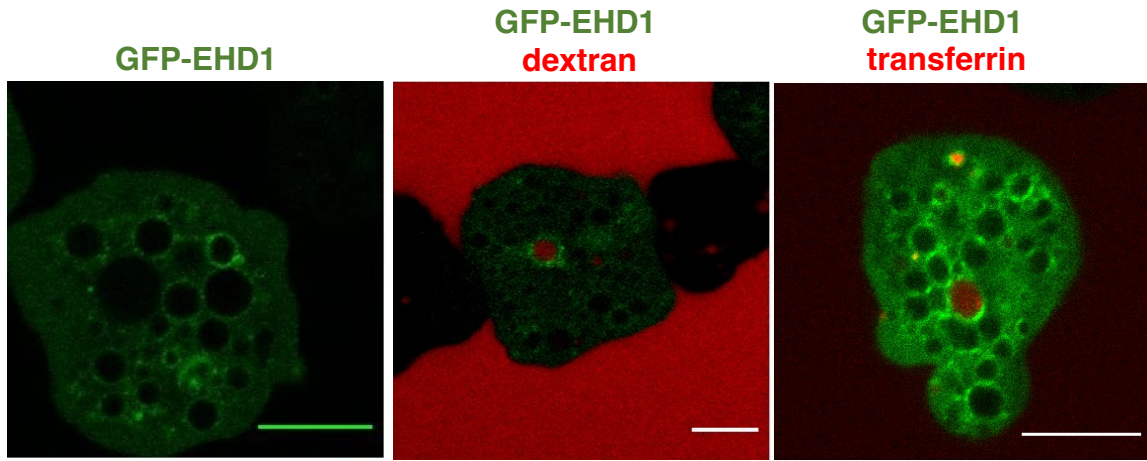



**Figure 9**

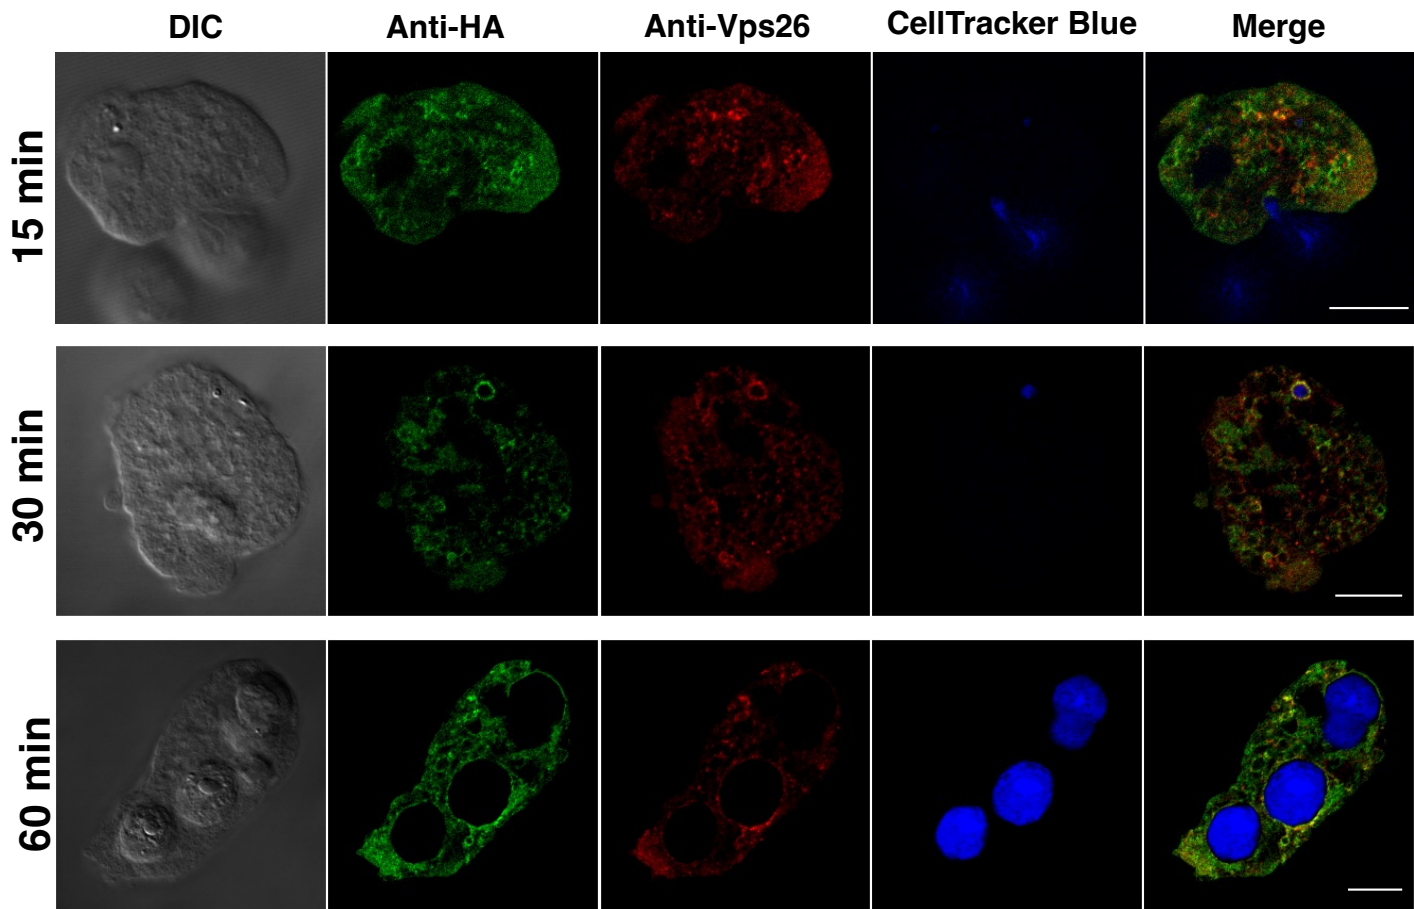

**Figure 10**

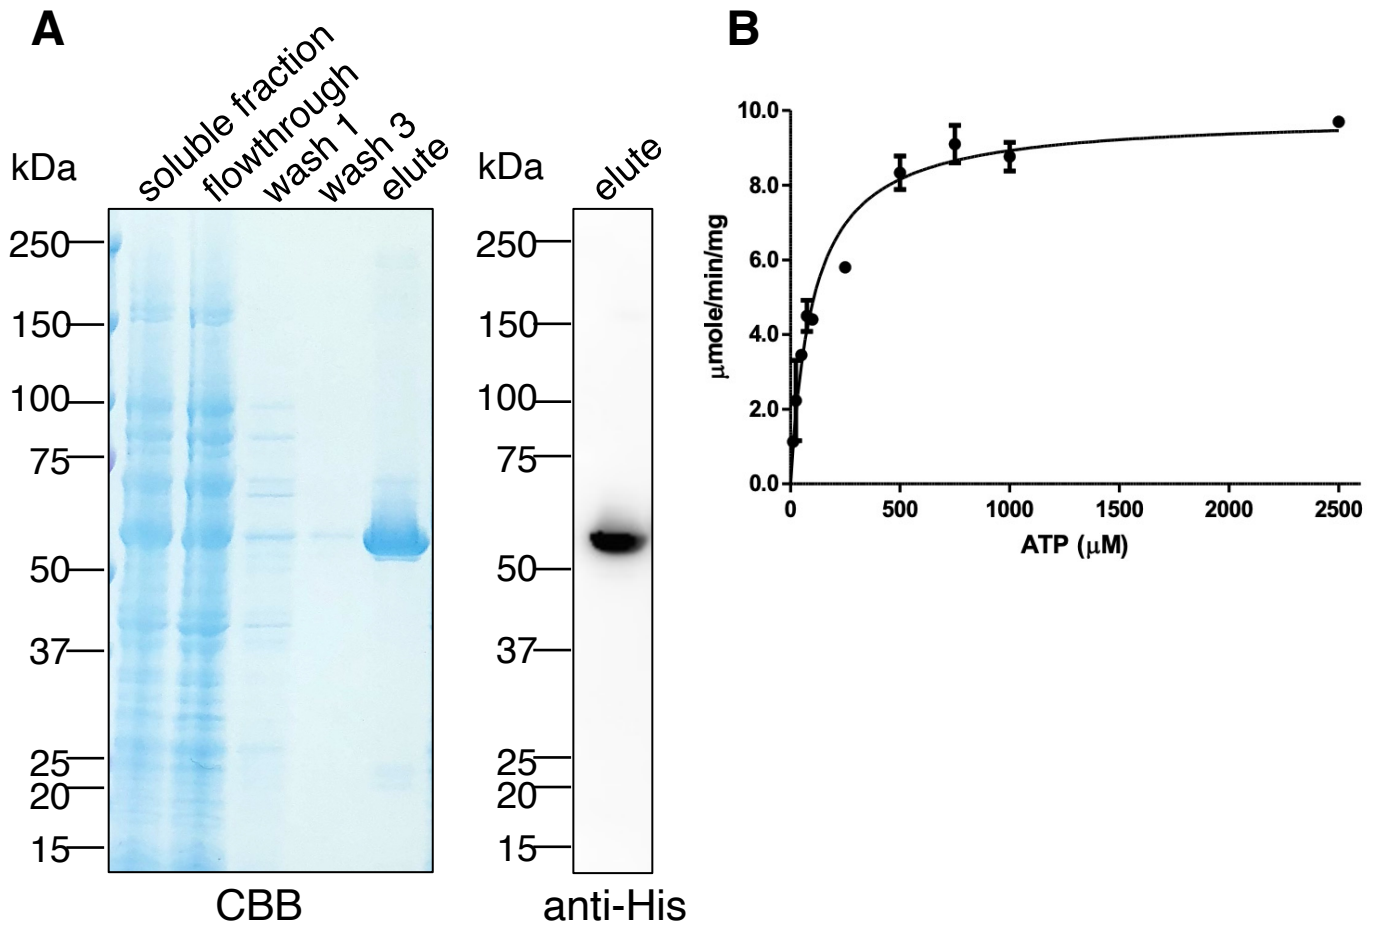

Source: http://biorxiv.org/content/10.1101/2022.01.16.476539v1.full.pdf
